1 **FRONT MATTERS**

2

3 **Title**

4 Intrinsic Gating Behavior of Voltage-Gated Sodium Channels Predetermines Regulation  
5 by Auxiliary  $\beta$ -subunits

6

7 **Authors**

8 Niklas Brake<sup>1,2,†</sup>, Adamo S Mancino<sup>3,4,†</sup>, Yuhao Yan<sup>3,4</sup>, Takushi Shimomura<sup>5,6</sup>, Heika  
9 Silveira<sup>4</sup>, Yoshihiro Kubo<sup>5,6</sup>, Anmar Khadra<sup>2,‡</sup> & Derek Bowie<sup>4,‡,\*</sup>

10

11 **Affiliations**

12 <sup>1</sup>Quantitative Life Sciences PhD Program, McGill University, QC, Canada.

13 <sup>2</sup>Department of Physiology, McGill University, QC, Canada.

14 <sup>3</sup>Integrated Program in Neuroscience, McGill University, QC, Canada.

15 <sup>4</sup>Department of Pharmacology and Therapeutics, McGill University, QC, Canada.

16 <sup>5</sup>Division of Biophysics and Neurobiology, National Institute for Physiological Sciences,  
17 Okazaki, Japan.

18 <sup>6</sup>Department of Physiological Sciences, School of Life Science, The Graduate University  
19 for Advanced Studies (SOKENDAI), Hayama, Japan.

20 <sup>†</sup>These authors contributed equally to this work.

21 <sup>‡</sup>Senior author.

22 <sup>\*</sup>Correspondence: derek.bowie@mcgill.ca.

23

24 **Abstract**

25 Voltage-gated sodium (Nav) channels mediate rapid millisecond electrical signaling in  
26 excitable cells. Auxiliary subunits,  $\beta$ 1- $\beta$ 4, are thought to regulate Nav channel function  
27 through covalent and/or polar interactions with the channel's voltage-sensing domains.  
28 How these interactions translate into the diverse and variable regulatory effects of  $\beta$ -  
29 subunits remains unclear. Here, we find that the intrinsic movement order of the voltage-  
30 sensing domains during channel gating is unexpectedly variable across Nav channel  
31 isoforms. This movement order dictates the channel's propensity for closed-state  
32 inactivation, which in turn modulates the actions of  $\beta$ 1 and  $\beta$ 3. We show that the  
33 differential regulation of skeletal muscle, cardiac, and neuronal Nav channels is explained  
34 by their variable levels of closed-state inactivation. Together, this study provides a unified  
35 mechanism for the regulation of all Nav channel isoforms by  $\beta$ 1 and  $\beta$ 3, which explains  
36 how the fixed structural interactions of auxiliary subunits can paradoxically exert variable  
37 effects on channel function.

38

39 **Title:** 107 (of 120) characters

40 **Abstract:** 149 (of 150) words

41 **Main Text:** 5,598 words

42 **Figures:** 7,

43 **Supplemental Figures:** 4, **Supplemental Tables:** 3

44

## 45 MAIN TEXT

### 46 Introduction

47  
48 Almost all ligand- and voltage-gated ion channels expressed in excitable tissue assemble as  
49 a signaling complex consisting of pore-forming and auxiliary subunits (Dolphin, 2018;  
50 Edelheit et al., 2009; Gonzalez-Perez and Lingle, 2019; Hull and Isom, 2018; Twomey et  
51 al., 2019). For example, the voltage-gated sodium (Nav) channel complex assembles from  
52 one of nine possible pore-forming  $\alpha$ -subunits (Nav1.1-Nav1.9) with 1-2 auxiliary  $\beta$ -subunits  
53 ( $\beta$ 1 to  $\beta$ 4) that together shape the rapid and varied kinetics of action potentials in brain,  
54 heart and skeletal muscle tissue (Catterall et al., 2005; Hull and Isom, 2018). Individual Nav  
55 channel  $\alpha$ -subunits form a tetrameric structure around a central Na<sup>+</sup>-selective pore from four  
56 non-identical domains (DI-DIV). Each domain contains 6 transmembrane segments (S1-S6)  
57 that are either responsible for voltage detection (S1-S4) or formation of the pore structure  
58 (S5-S6) (Ahern et al., 2016; Jiang et al., 2020; Pan et al., 2018). Biochemical and  
59 electrophysiology studies as well as recent full-length cryo-EM Nav structures have  
60 revealed that these domains are selectively targeted by  $\beta$ -subunits:  $\beta$ 1 and  $\beta$ 3 subunits form  
61 polar interactions with DIII or DIV (Hsu et al., 2017; Hull and Isom, 2018; Pan et al., 2018;  
62 Yan et al., 2017) whereas  $\beta$ 2 and  $\beta$ 4 establish covalent links with DI and/or DII (Das et al.,  
63 2016; Hull and Isom, 2018; Isom et al., 1995, 1992; Shen et al., 2019). Together, these  
64 findings establish a common structural view of the interactions between  $\alpha$ - and  $\beta$ -subunits.

65 Despite this, the effects of  $\beta$ 1 and  $\beta$ 3 on channel function remain undetermined.  
66 Although numerous electrophysiological studies have characterized the effects of  $\beta$ 1, in the  
67 two most heavily studied Nav channels Nav1.4 and Nav1.5 –  $\beta$ 1 has been shown to produce  
68 large (Bendahhou et al., 1995; Zhu et al., 2017), moderate (Malhotra et al., 2001; Nuss et  
69 al., 1995), or even no changes (Ferrera and Moran, 2006; Nuss et al., 1995) to channel  
70 gating. This variability, even within a single Nav channel isoform, demonstrates that the  
71 emerging structural view of  $\beta$ -subunits has been, so far, insufficient to explain their effects  
72 on channel function.

73 Here, we attempted to reconcile this apparent disconnect between structural and  
74 electrophysiological studies. Because  $\beta$ -subunits have been shown to alter voltage sensor  
75 movements to produce their functional changes in Nav1.5 channels (Zhu et al., 2017), we  
76 began by investigating the contributions of each voltage sensor to the gating of Nav1.5e, a  
77 neonatal form of Nav1.5 that is expressed in the brain (Wang et al., 2017). Using voltage-  
78 sensor neutralization experiments, voltage-clamp fluorometry (VCF), and kinetic  
79 modelling, we find that the functional contributions of each voltage sensor are not fixed.  
80 Instead, we demonstrate that the sequence of voltage sensor movements is variable, which  
81 in turn modulates the contributions of each voltage sensor to channel activation and  
82 inactivation. We further show that this mechanism determines the functional consequences  
83 of  $\beta$ 1 and  $\beta$ 3 association with cardiac Nav1.5 channels, skeletal muscle Nav1.4 channels,  
84 and neuronal Nav1.6 channels. Finally, through an analysis of previously published studies,  
85 we find that this mechanism successfully explains the variable regulation of all Nav channel  
86 isoforms by  $\beta$ 1. We conclude that  $\beta$ 1 and  $\beta$ 3 impose a defined structural influence on all  
87 Nav channels and that their variable allosteric effects are determined by the intrinsic  
88 dynamics of the channel's voltage sensors.

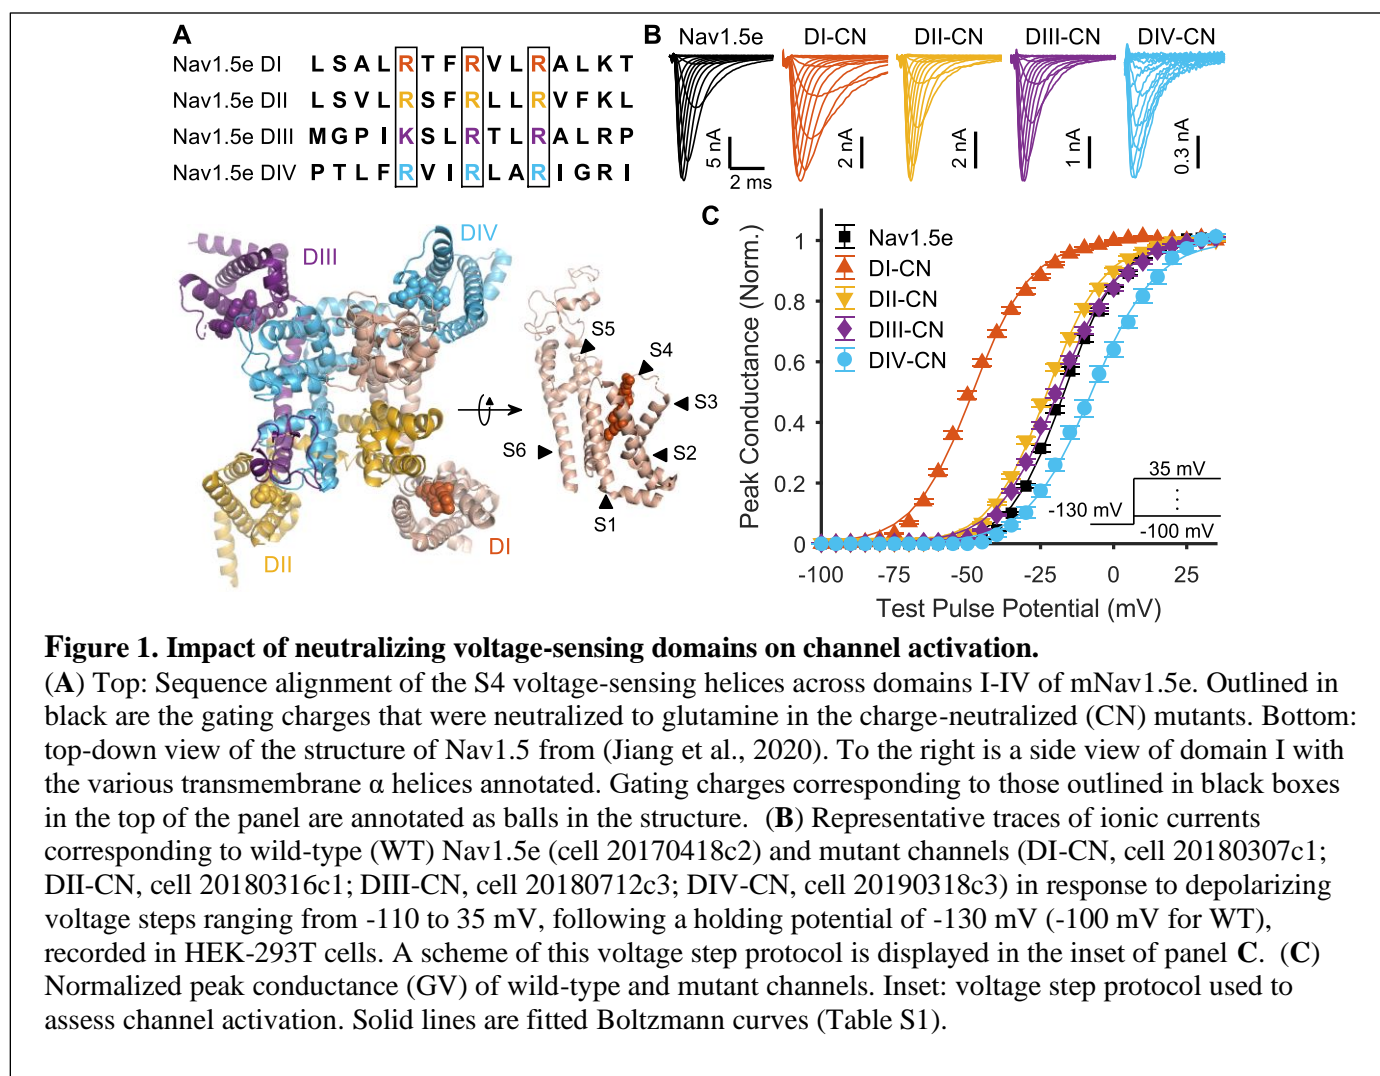

## 90 Results

### 91 Voltage Sensor Charge Neutralization Identifies the Dominant Role of DI in Channel 92 Activation

93 Voltage-detection in Nav channels is mediated by gating charges (Arg or Lys residues) on  
 94 each S4 segment (Fig. 1A) which together promote movement in individual S3-S4 voltage  
 95 sensors following changes in the membrane electric field. To study the contribution of  
 96 individual S3-S4 voltage sensors to channel gating, the first three gating charges in each S4  
 97 segment of the mouse Nav1.5e channel were mutated to glutamines to generate four charge-  
 98 neutralized (CN) mutant channels: DI-CN, DII-CN, DIII-CN, DIV-CN (Fig. 1A). We  
 99 reasoned that neutralization of individual voltage sensors would render the domain  
 100 insensitive to changes in the membrane potential and, as such, would inform us about the  
 101 biophysical properties of Nav1.5e, as reported for other voltage-gated sodium and  
 102 potassium channels (Bao et al., 1999; Capes et al., 2013, 2012; Gagnon and Bezanilla,  
 103 2009; Sheets et al., 1999). Nav1.5e channels and the charge-neutralized mutants were  
 104 characterized in HEK-293T cells transiently transfected with wildtype and mutant cDNAs.

105 To assess channel activation, macroscopic Na<sup>+</sup> currents were recorded by applying  
106 depolarizing voltage steps in increments of +5 mV (Range, -110 and 55 mV), each from a  
107 holding potential of -130 mV (-100 mV for wildtype channels) (Fig. 1B). The voltage-  
108 dependence of channel activation for wildtype and mutant channels was then determined by  
109 fitting the peak conductance (G/V) with a Boltzmann function (Fig. 1C).

110 Charge neutralization led to statistically significant (see methods) shifts in the  
111 activation profile of all mutant Nav1.5e channels, with DI charge neutralization producing  
112 the greatest impact (Fig. 1C). Fits of peak G/V relationships estimated the voltage for half-  
113 maximal activation ( $V_{1/2}$ ) to be  $-16.8 \pm 0.45$  mV ( $n = 51$ ) for wildtype channels compared to  
114  $-48.1 \pm 0.55$  mV ( $n = 24$ ) for DI-CN (Fig. 1C, Table S1), representing a 30 mV  
115 hyperpolarizing shift in channel activation. The slope factor ( $k$ ) was similar for wildtype ( $k$   
116  $= 9.0 \pm 0.13$  mV,  $n = 51$ ) and DI-CN channels ( $k = 9.9 \pm 0.13$  mV,  $n = 24$ ). In contrast,  
117 charge neutralization of DII and DIII had a more modest effect on channel activation with  
118  $V_{1/2}$  values of  $-22.6 \pm 0.54$  mV ( $n = 26$ ) and  $-19.0 \pm 0.58$  mV ( $n = 23$ ), respectively (Fig.  
119 1C), corresponding to hyperpolarizing shifts in activation of about 6 and 2 mV compared to  
120 wildtype Nav1.5e (Table S1). Finally, charge neutralization of DIV had the opposite effect  
121 on channel activation, shifting the  $V_{1/2}$  value to  $-7.4 \pm 1.26$  mV ( $n = 14$ ) (Fig. 1C),  
122 representing a 10 mV *depolarizing* shift in channel activation compared to wildtype  
123 Nav1.5e (Table S1). Similar relative shifts in channel activation were observed when DI  
124 through to DIV voltage sensors were charge neutralized in the adult form of Nav1.5 (i.e.  
125 mH1), demonstrating that our observations are not specific to the neonatal form of Nav1.5  
126 (Fig. S1). Our observations on Nav1.5 are comparable with previous findings on skeletal  
127 muscle Nav1.4 channels, with the exception of DIV-CN which did not depolarize activation  
128 in Nav1.4 (Capes et al., 2013).

### 129 **DI Movement Is the Rate-Limiting Step for Pore Opening**

131 The canonical Nav channel gating model postulates that DI-III movements are necessary for  
132 pore opening and DIV movement is sufficient and rate-limiting for inactivation (Ahern et  
133 al., 2016). To understand why neutralizing DIV affected activation (Fig. 1C), we attempted  
134 to explain our Nav1.5e data using a mathematical implementation of this gating model (Fig.  
135 2A) (Capes et al., 2013). The model successfully captured the wildtype Nav1.5e data after  
136 the rate constants were re-parametrized using a custom-made evolutionary-type fitting  
137 algorithm (Fig. S2, Table S2) (see Methods).

138 We hypothesized that DI-CN hyperpolarizes G/V because DI movement is normally  
139 rate-limiting for pore opening and that, conversely, DIV-CN might depolarize the G/V  
140 relationship by slowing the rate of pore opening. In the kinetic gating model, the rates that  
141 determine the transitions from the resting state to the open state are  $\alpha$  and  $\gamma$  (Fig. 2A). To  
142 investigate how the voltage-dependence of the G/V relationship depends on these rates, we  
143 performed a sensitivity analysis with respect to parameters  $\alpha^*$  and  $\gamma^*$  (Table S2). This  
144 analysis indicated that if domain neutralization accelerates or slows the rate of pore  
145 opening, the G/V relationship should be hyperpolarized or depolarized, respectively (Fig.  
146 S2E, F). For example, decreasing  $\alpha$  and  $\gamma$  by 80% led to a depolarizing shift in the G/V  
147 relationship while increasing the rates by 400% led to a hyperpolarizing shift (Fig. 2B, C),  
148 consistent with our expectations.

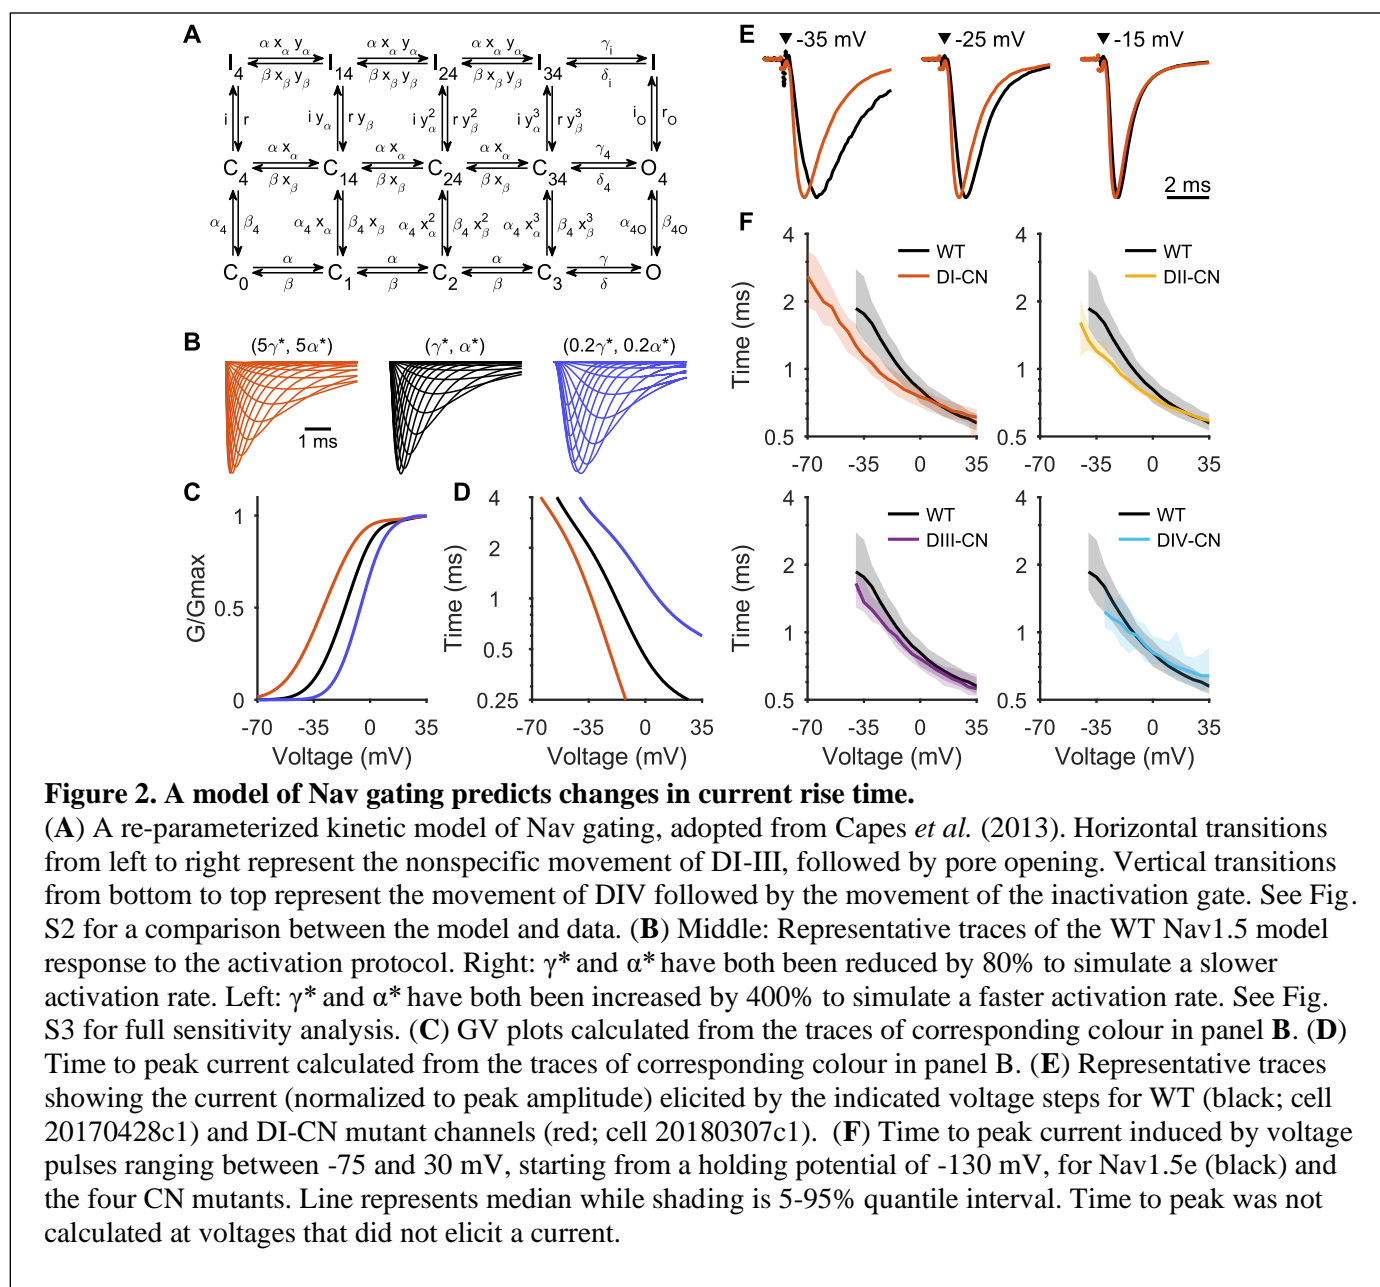

149  
150  
151  
152  
153  
154  
155  
156  
157  
158

Additionally, our simulations revealed that a faster or slower rate of pore opening should accelerate or slow the response risetime, respectively (Fig. 2B, D). This observation is in line with single-channel studies, which have reported that the time course of macroscopic currents is primarily determined by the latency to first opening (Aldrich *et al.*, 1983). To validate our hypotheses about DI and DIV, we therefore measured the risetime to peak current of each mutant Nav channel (Fig. 2E, F). As anticipated, DI-CN channels displayed faster risetimes at hyperpolarized membrane potentials (Fig. 2F), suggesting that DI movement is normally rate-limiting for pore opening. The risetimes of DII-CN and DIII-CN mutant channels were likewise consistent with their more modest impacts on the  $V_{1/2}$  of channel activation (Fig. 1C; Fig. 2F). Unexpectedly, DIV-CN mutants did not display



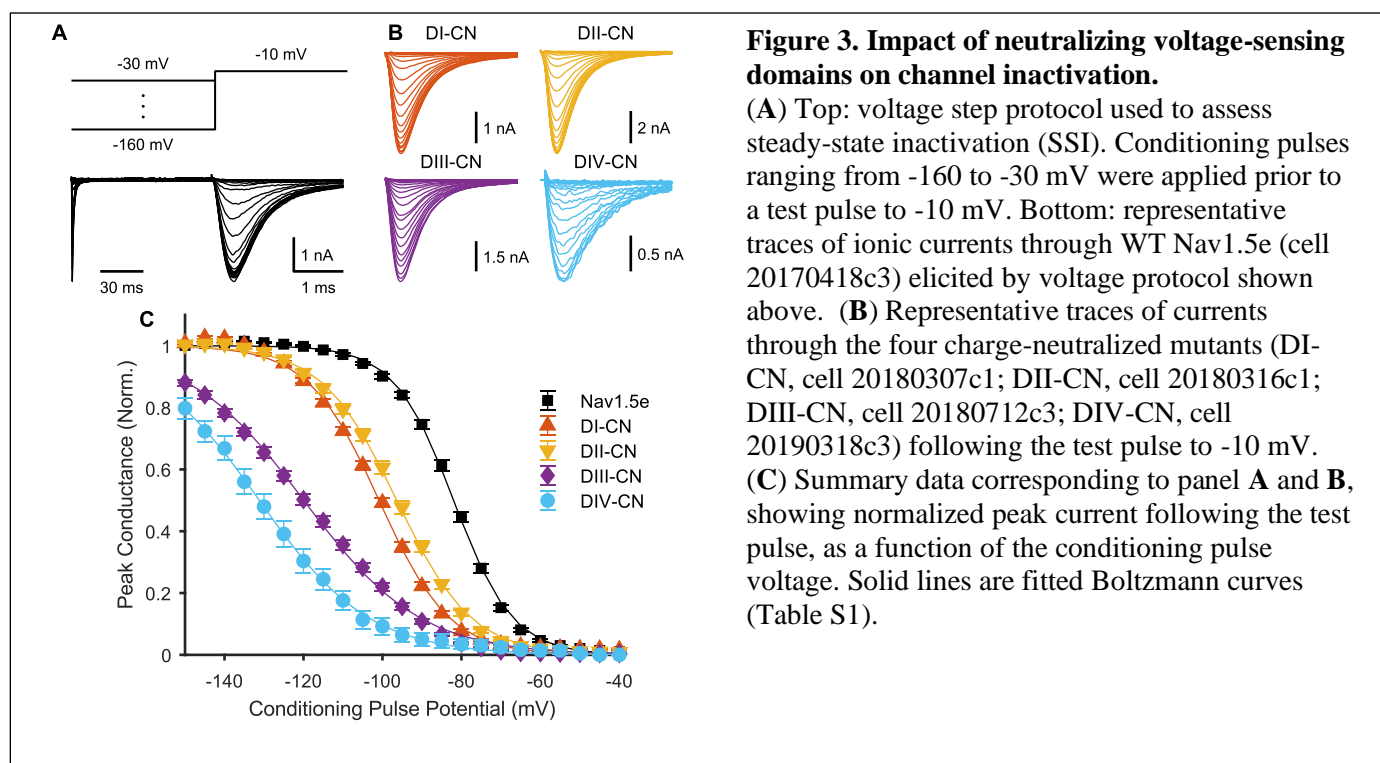

159 slower response risetimes relative to WT channels (Fig. 2F), suggesting that neutralizing  
 160 DIV does not slow the rate of pore opening. We therefore concluded that DIV-CN must  
 161 shift the G/V relationship through a separate mechanism. Since DIV is intrinsically  
 162 involved in Nav1.5 inactivation (Jiang et al., 2020), we hypothesized that charge  
 163 neutralization of DIV may affect the voltage-dependence of activation indirectly because of  
 164 the interdependence of the two processes. As explained below, we examined this by  
 165 measuring the impact of charge neutralization on steady-state inactivation.

### 166 Voltage Sensors of All Domains Contribute to Steady-State Inactivation of Nav1.5e 167 Channels 168

169 Steady-state inactivation (SSI) of wildtype and mutant Nav1.5e channels was determined by  
 170 applying a 100 ms-long conditioning pulse (range, -160 to -5 mV) followed by a test pulse  
 171 of -10 mV to elicit Na<sup>+</sup> currents (Fig. 3A, B). SSI plots were then constructed by fitting the  
 172 peak response at each test potential with a Boltzmann function (Fig. 3C). In agreement with  
 173 previous work on Nav1.4 (Capes et al., 2013), neutralizing DIV had the largest effect on  
 174 SSI, shifting the  $V_{1/2}$  from  $-82.0 \pm 0.52$  mV in wildtype channels to  $-131.1 \pm 2.55$  mV ( $n =$   
 175  $13$ ) in DIV-CN mutants (Table S1). The slope factor for the inactivation curve was  
 176 significantly flatter for DIV-CN mutants ( $k = -13.7 \pm 1.46$ ,  $n = 13$ ) than for wildtype  
 177 Nav1.5e channels ( $k = -7.2 \pm 0.14$ ,  $n = 49$ ), indicating a lower sensitivity to membrane  
 178 potential. Charge neutralization of DIII affected SSI in a manner similar to neutralizing  
 179 DIV, hyperpolarizing the  $V_{1/2}$  of inactivation by 40 mV to  $-120.0 \pm 1.09$  mV ( $n = 23$ ) and  
 180 flattening the SSI slope factor to  $-14.4 \pm 0.15$  ( $n = 23$ ). Although measurements of SSI for  
 181 DI and DII-CN mutants differed from wildtype Nav1.5e, the shift was less than for DIII and  
 182 DIV-CN mutants. The  $V_{1/2}$  of inactivation was estimated to be  $-100.9 \pm 0.54$  mV ( $n = 23$ )

183 and  $-96.5 \pm 0.82$  mV ( $n = 25$ ) for DI and DII-CN mutants, respectively (Fig. 3C, Table S1)  
184 corresponding approximately to 20 mV and 15 mV hyperpolarizing shifts. Similar relative  
185 shifts in SSI were also observed from charge-neutralized adult Nav1.5 channel mutants  
186 (Fig. S3), again demonstrating that our observations are not specific to the neonatal form of  
187 Nav1.5. However, these results were starkly different from past studies on Nav1.4 (Capes et  
188 al., 2013), where only DIV-CN mutants displayed altered SSI.

### 189 **Voltage-Clamp Fluorometry Reveals That Domains III and IV Are Necessary for** 190 **Inactivation** 191

192 The charge neutralization experiments suggest that, at least for Nav1.5, both DIII and DIV  
193 may be involved directly in inactivation, since their neutralization led to both a dramatic  
194 hyperpolarization of SSI and a decreased sensitivity of inactivation to changes in membrane  
195 potential. Although a role for DIII in inactivation has been proposed previously (Armstrong,  
196 2006; Armstrong and Hollingworth, 2018; Cha et al., 1999), charge neutralization data of  
197 Nav1.4 channels suggests that DIV alone is sufficient for inactivation (Capes et al., 2013).  
198 The argument favouring sufficiency is that neutralizing DIV in Nav1.4 leads to a shift in  
199 SSI that is so hyperpolarized, domains with intact voltage sensors must be in their  
200 deactivated state (Ahern et al., 2016; Capes et al., 2013). However, recent VCF data has  
201 shown that DIII activates at more hyperpolarized potentials in human Nav1.5 channels than  
202 in Nav1.4 channels (Chanda and Bezanilla, 2002; Hsu et al., 2017). To test whether this is  
203 also the case for the neonatal Nav1.5 used in this study, we quantified the intrinsic voltage-  
204 sensitivity of each domain in *Xenopus* oocytes using VCF. Fluorescent probes were  
205 conjugated to each domain, thereby engineering four domain-tagged VCF constructs: DI\*,  
206 DII\*, DIII\* and DIV\*. Steady-state fluorescence was then measured at voltage steps  
207 ranging from -150 mV (-180 mV for DIII\*) to 50 mV.

208 In agreement with other VCF studies of Nav1.5 channels, the fluorescence-voltage (F-  
209 V) curve for DI\* was more hyperpolarized than that for DII\* (Fig. 4A, B) (Hsu et al., 2017;  
210 Varga et al., 2015). The voltage-dependence of the fluorescence signal of both DI\* and  
211 DII\* exhibited  $V_{1/2}$  values of  $-65.4 \pm 2.3$  mV ( $n = 13$ ) and  $-44.1 \pm 0.7$  mV ( $n = 17$ ) (see also,  
212 Table S1), respectively, which were approximately 10 mV more depolarized than  $V_{1/2}$   
213 values reported for adult Nav1.5 channels (Hsu et al., 2017; Varga et al., 2015). This  
214 difference is in keeping with the more depolarized threshold for activation of Nav1.5e  
215 channels compared to the adult Nav1.5 splice variant (Onkal et al., 2008). Interestingly, the  
216 F-V plot of DII\* had a shallower slope ( $k = 22.2 \pm 0.6$ ,  $n = 17$ ) compared to DI\* ( $k = 12.3 \pm$   
217  $1.2$ ,  $n = 13$ ), indicating that DII has a lower sensitivity to changes in membrane potential  
218 (Fig. 4A, B).

219 The normalized F-V relationship for DIII\* was significantly more hyperpolarized than  
220 DI\* and DII\* with a  $V_{1/2}$  value of  $-137.4 \pm 1.1$  mV ( $n = 27$ ) and a slope factor of  $15.9 \pm 0.6$   
221 (Fig. 4C). Interestingly, the fluorescence signal was biphasic, reaching a maximum at about  
222 -50 mV and declining in intensity at more depolarized potentials (Fig. 4C). This finding  
223 suggests that the voltage sensor of DIII may exhibit two distinct movements, analogous to  
224 the dynamics of the voltage sensor reported for Shaker K<sup>+</sup>-channels (Cha and Bezanilla,  
225 1997) and DIII of Nav1.4 channels (Cha et al., 1999).

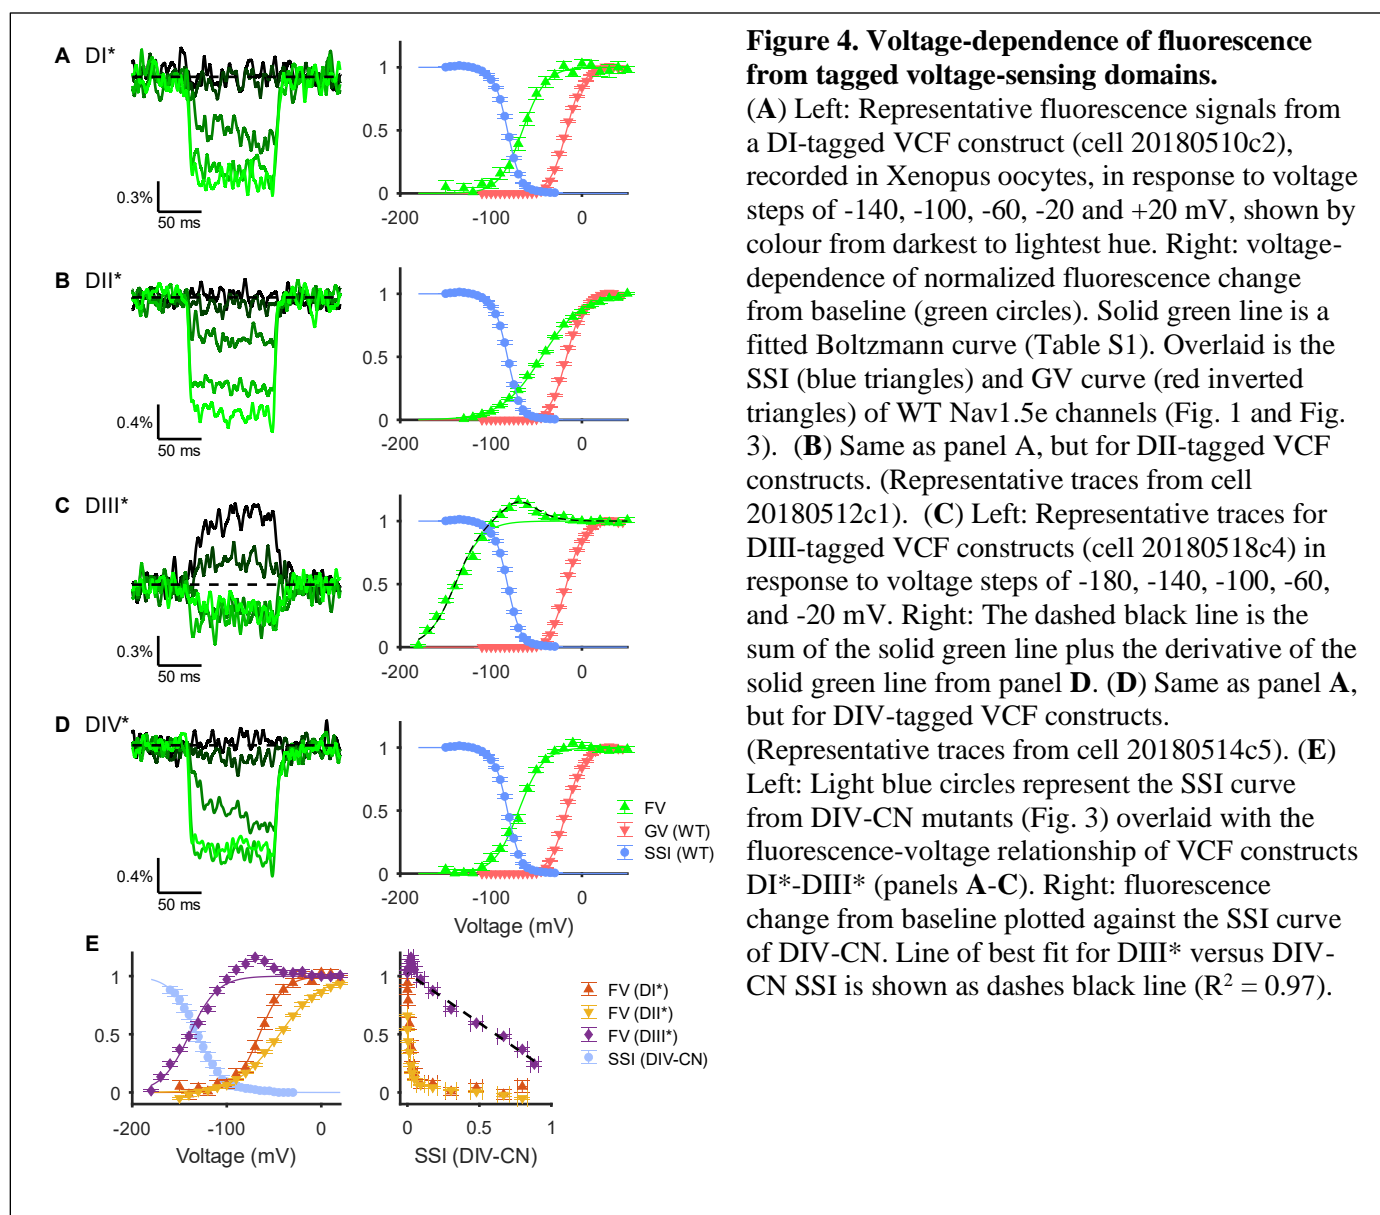

226 The F-V relationship observed for DIV\* fluorescence occurred over a similar voltage  
 227 range as SSI in WT channels (Fig. 4D) in keeping with the role of this domain in  
 228 inactivation. The  $V_{1/2}$  value was  $-69.5 \pm 1.3$  mV ( $n=15$ ) and the slope factor was  $13.2 \pm 0.5$   
 229 mV. Interestingly, at the potentials at which we observed DIV movement, the F-V  
 230 relationship of DIII\* deviates distinctly from a Boltzmann function. We observed that the  
 231 fluorescence change of DIII was well fit by a Boltzmann function plus the derivative of the  
 232 DIV\* Boltzmann fit (Fig. 4C). This observation might suggest an interaction between DIII  
 233 and DIV movement, or between DIII and the binding of the inactivation motif.

234 Finally, the voltage dependence of the F-V plot for DIII\* was strongly correlated with  
 235 measurements of steady-state inactivation in DIV-CN mutants (Fig. 4E, left). In fact,  
 236 plotting the SSI of DIV-CN mutants versus the fluorescence signal of DIII\* at each  
 237 membrane potential displayed a strong linear correlation (Fig. 4E, right). In contrast, the F-



V curves for DI\* and DII\* were too depolarized to be correlated to SSI in DIV-CN mutants (Fig. 4E). This finding indicates that in the absence of DIV gating charges, DIII movement determines the voltage-dependence of SSI. Together with our previous results (Fig. 3C), this observation strongly suggests that in Nav1.5, both DIII and DIV are intrinsically necessary for channel inactivation, whereas DI and DII are not.

### Order of Voltage Sensor Movement Determines Closed-State Inactivation

The identified role of DIII in inactivation explains why DIII-CN affects SSI similarly to DIV-CN (Fig. 3C). We were thus left with two unexplained observations: why does neutralizing DI and DII hyperpolarize SSI (Fig. 3C) if they are not involved in inactivation (Fig. 4), and why does neutralizing DIV affect activation (Fig. 1C) if DIV movement is not necessary for pore opening (Fig. 2)? Since these effects did not occur in Nav1.4 channels (Capes et al., 2013), to understand our observations, we compared the outcomes of our reparametrized Nav1.5 model (Table S2) to the Capes *et al.* Nav1.4 model (Capes et al., 2013). We simulated DII-CN by removing the leftmost column of the model, consisting of the states C0, C4, and I4 (Fig. 5A). This is equivalent to assuming that the first step in the activation process is already complete; that is, the relevant domain has been biased towards its “active” conformation. Removal of states C0, C4, and I4 caused a leftward shift in the SSI curve without affecting activation in the Nav1.5 model (Fig. 5B). This shift in SSI was due to positive cooperativity between gating transitions that lead to channel activation and movement of the DIV voltage sensor ( $x_{\alpha}/x_{\beta} > 1$ , see Table S2). Notably, such cooperativity between voltage sensors has been reported in past VCF studies (Campos et al., 2007; Chanda et al., 2004). As a result of this cooperativity, neutralizing DI and DII increases the probability of inactivation directly from closed states, i.e. closed-state inactivation (CSI), even though they are not themselves necessary for inactivation.

Repeating our numerical experiment with the Nav1.4 parameters estimated by Capes et al. (Capes et al., 2013) revealed that the Nav1.4 model predicted their experimental observations, i.e. SSI was not affected (Fig. 5C). This was not because of a lack of interdomain coupling. In fact, the Nav1.4 model has similar levels of interdomain coupling as the Nav1.5 model (Nav1.4:  $x_{\alpha}/x_{\beta} = 8.33$ , Capes et al., 2013; Nav1.5:  $x_{\alpha}/x_{\beta} = 8.01$ , Table S2). However, we noted that in the Nav1.4 model, DIV moved exclusively following DI-III, whereas this was not true in the Nav1.5 model. Since DIV movement is necessary for inactivation, if DIV moves exclusively following pore opening, then CSI is not possible. To confirm that this difference was sufficient to explain the outcomes of neutralizing DI and DII in Nav1.4 and Nav1.5 channels, we modified the Nav1.5 parameters to force DIV to move only after pore opening (see Methods). Indeed, simulating DII-CN in this modified “low CSI” Nav1.5 model did not appreciably alter gating (Fig. 5D), consistent with experiments on Nav1.4. Altogether, these results suggest that Nav1.5 channels have an intrinsically higher propensity for CSI compared to Nav1.4 channels, which in turn modulates the functional consequences of neutralizing DI and DII.

We next simulated the effects of DIV-CN. Removing the entire bottom row of the model led to unrealistic conductance profiles (data not shown). We therefore elected to simulate DIV-CN by drastically biasing the transition probability from the bottom row to

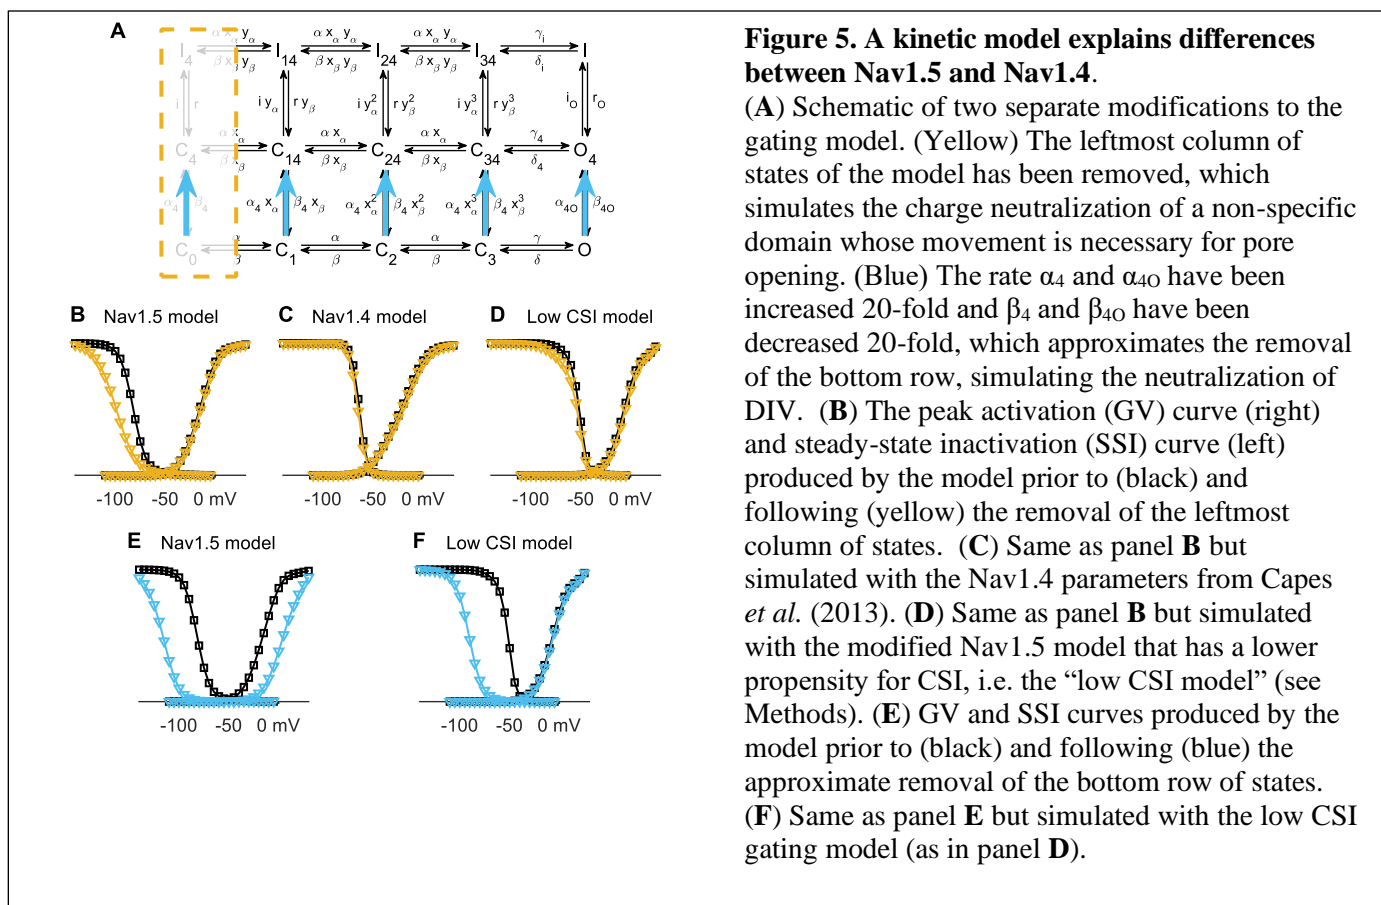

281 the middle row, by increasing the rates  $\alpha_4$  and  $\alpha_{40}$  20-fold and decreasing the rates  $\beta_4$  and  
 282  $\beta_{40}$  20-fold (Fig. 5A). In the Nav1.5e model, simulating DIV-CN led to a hyperpolarization  
 283 of the SSI curve and depolarization of the GV curve (Fig. 5E), consistent with our  
 284 experimental observations from Nav1.5e DIV-CN mutants (Fig. 1C and Fig. 3C). In the  
 285 modified “low CSI” model, the same manipulation hyperpolarized SSI, with no effect on  
 286 channel activation (Fig. 5F), again consistent with the effects of neutralizing DIV in Nav1.4  
 287 (Capes *et al.*, 2013). These observations can be explained as follows. In the Nav1.5e (high  
 288 CSI) model, the voltage-dependence of activation is set by a competition between pore  
 289 opening and (closed-state) inactivation. When DIV is neutralized, inactivation is faster,  
 290 shifting the balance towards CSI and thus requiring more depolarized voltages for pore  
 291 opening to outcompete inactivation. In the low CSI gating model, activation is much faster  
 292 than inactivation at all voltages, such that the voltage-dependence of activation represents  
 293 the steady-state probability of pore opening, and thus is largely unaffected by a faster  
 294 inactivation rate. In summary, both of the aforementioned differences in Nav1.4 and Nav1.5  
 295 CN mutants can be explained by differences in their intrinsic propensities for CSI.

### 296 297 Auxiliary $\beta$ -Subunits Selectively Target Closed-State Inactivation

298 The above results demonstrate that the functional contributions of each voltage sensor to  
 299 channel gating depends both on the intrinsic coupling of the voltage sensor to the activation  
 300 and/or inactivation processes *and* the sequential order of voltage sensor movements. In

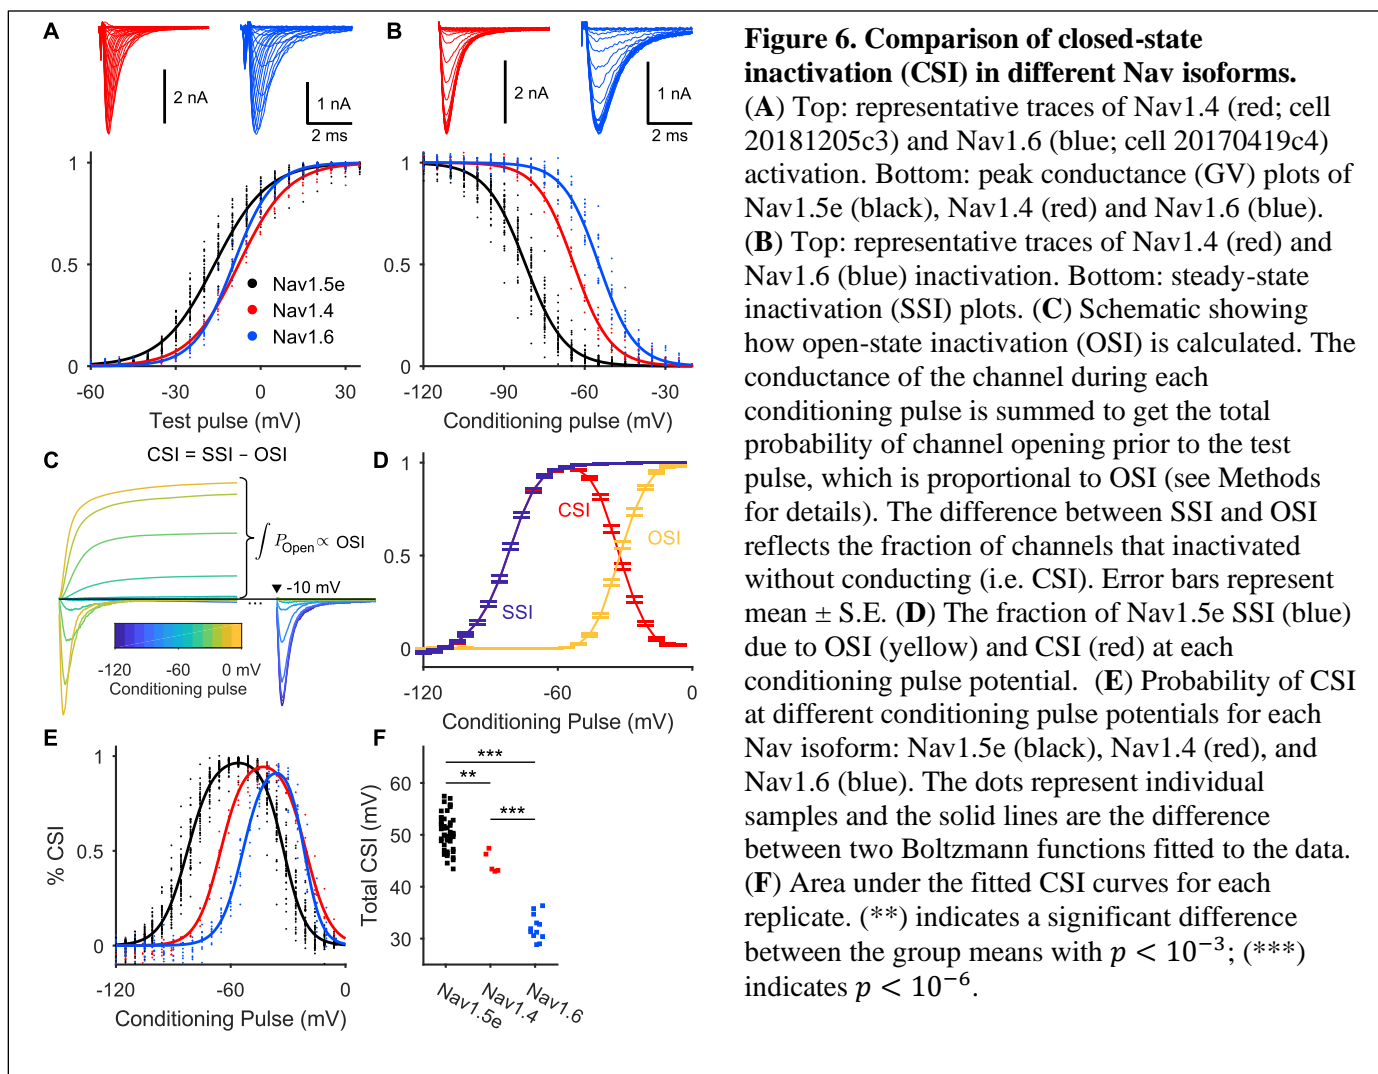

301 particular, we found that, with the exception of DIII, the voltage sensors in Nav1.4 and  
 302 Nav1.5 are intrinsically coupled to essentially the same gating processes; however, in  
 303 Nav1.5 a disposition for early DIV movement, and thus CSI, alters the consequences of  
 304 voltage sensor neutralization. To extend these results beyond voltage sensor neutralization,  
 305 we used the high and low CSI gating models developed in the previous section to analyze a  
 306 range of more general gating perturbations, and found that the high and low CSI models  
 307 responded in fundamentally different ways (Fig. S4). For example, stabilizing the resting  
 308 state of DIV in the low CSI model did not alter activation or inactivation, whereas in the  
 309 high CSI model the same perturbation depolarized SSI (Fig. S4). This was intriguing,  
 310 because  $\beta 1$  and  $\beta 3$  subunits are thought to stabilize the resting state of DIV (Zhu et al.,  
 311 2017). Our results thus predict that  $\beta 1$  and  $\beta 3$  subunits should differentially regulate high  
 312 and low CSI channels, not because  $\beta 1$  and  $\beta 3$  interact with the voltage sensors differently,  
 313 but simply because their CSI levels are different. This would suggest an unappreciated,  
 314 physiological role for the sequence of voltage sensor movements in that it determines CSI  
 315 levels. To test this, we sought to investigate the effects of  $\beta 1$  and  $\beta 3$  on Nav channels with  
 316 different levels of CSI.

317 We first collected data from three different Nav channels: namely skeletal muscle  
318 Nav1.4 channels, cardiac Nav1.5 channels, and neuronal Nav1.6 channels (Fig. 6A, B). To  
319 experimentally quantify their propensities for CSI, we adapted the method proposed by  
320 Armstrong (Armstrong, 2006); briefly, the total conductance observed during a conditioning  
321 pulse was compared to the fraction of available channels during a subsequent test pulse  
322 (Fig. 6C, see also Methods). This analysis estimates the amount of open-state inactivation  
323 (OSI) occurring during the conditioning pulse, with CSI being defined as the fraction of SSI  
324 that cannot be accounted for by open state inactivation (OSI) (Fig. 6D). The estimated  
325 fraction of SSI occurring from closed states for Nav1.5e peaked at 100% and remained high  
326 for a large range of voltages (Fig. 6D, E). This was consistent with the Nav1.5e gating  
327 model where CSI can be determined exactly by adding up all the inactivation that occurs  
328 from closed states. To quantitatively compare CSI levels between isoforms, we fit the CSI  
329 curve with the difference of two Boltzmann curves; the integral of this function was defined  
330 to be the total amount of CSI. This analysis revealed that the three isoforms exhibited  
331 distinct levels of CSI (Fig. 6F), with Nav1.5e displaying the most, followed by Nav1.4 and  
332 finally Nav1.6 (Fig. 6F).

333 If  $\beta 1$  and  $\beta 3$  regulate gating by stabilizing the resting state of DIV (Zhu et al., 2017),  
334 we would expect each of these isoforms to be differentially regulated, due to their distinct  
335 levels of CSI (see above). Coexpression of each isoform with either  $\beta 1$  or  $\beta 3$  confirmed this  
336 hypothesis.  $\beta 1$  and  $\beta 3$  led to depolarizing shifts in SSI of Nav1.5e, with no effects on  
337 channel activation (Fig. 7A). Consequently, the amount of total CSI was significantly  
338 reduced by both  $\beta$ -subunits (Fig. 7B). Nav1.4, which in our hands exhibited moderate levels  
339 of CSI (Fig. 6F), displayed moderate depolarizing shifts in SSI when coexpressed with  $\beta 1$   
340 or  $\beta 3$  (Fig. 7C). CSI was reduced (Fig. 7D), but to a lesser degree than for Nav1.5e. Finally,  
341 activation and inactivation of Nav1.6 was unaffected by  $\beta$ -subunit coexpression (Fig. 7E),  
342 and the amount of total CSI was not altered (Fig. 7F). In summary,  $\beta 1$  and  $\beta 3$  depolarized  
343 SSI in each channel to a degree commensurate with the level of CSI displayed by the  $\alpha$ -  
344 subunit alone (Fig. 6 and Fig. 7A-F), validating the regulatory mechanism proposed above.

345 It is well known that the effects of  $\beta$ -subunits on channel gating varies substantially  
346 between studies. We asked whether this variability could be explained by differences in  
347 CSI. To do this, we compared the reported effects of  $\beta 1$  on Nav1.1-Nav1.8 (Table S3). (We  
348 did not find sufficiently many studies to perform the same analysis for  $\beta 3$ .) This cross-study  
349 comparison did not reveal strong evidence for  $\beta 1$  altering the voltage-dependence of  
350 activation (Table S3). However, the voltage-dependence of SSI exhibited large shifts  
351 following  $\beta 1$  coexpression (Fig. 7G, left). These shifts were extremely variable across  
352 studies, even between studies on the same  $\alpha$ -subunit (Fig. 7G, left), suggesting that the  
353 varied effects of  $\beta 1$  are not due to isoform differences. Since we could not calculate CSI  
354 without access to the current recordings, we defined a “naïve” measure of CSI for each  
355 report as the difference between the  $V_{1/2}$  of activation and SSI, which we denote CSI\* (Fig.  
356 7G, right). CSI\* of the  $\alpha$ -subunits alone varied significantly across studies (Fig. 7G, right),  
357 but was nevertheless linearly correlated with the shifts in SSI following coexpression with  
358  $\beta 1$  ( $R^2=0.7$ ). These observations indicate that the regulation of all Nav channel isoforms by  
359  $\beta 1$  is determined by CSI. Altogether, these results suggest that the seemingly paradoxical  
360 reports of  $\beta 1$  regulation in the literature are, in fact, consistent with a singular mechanism of  
361 action.



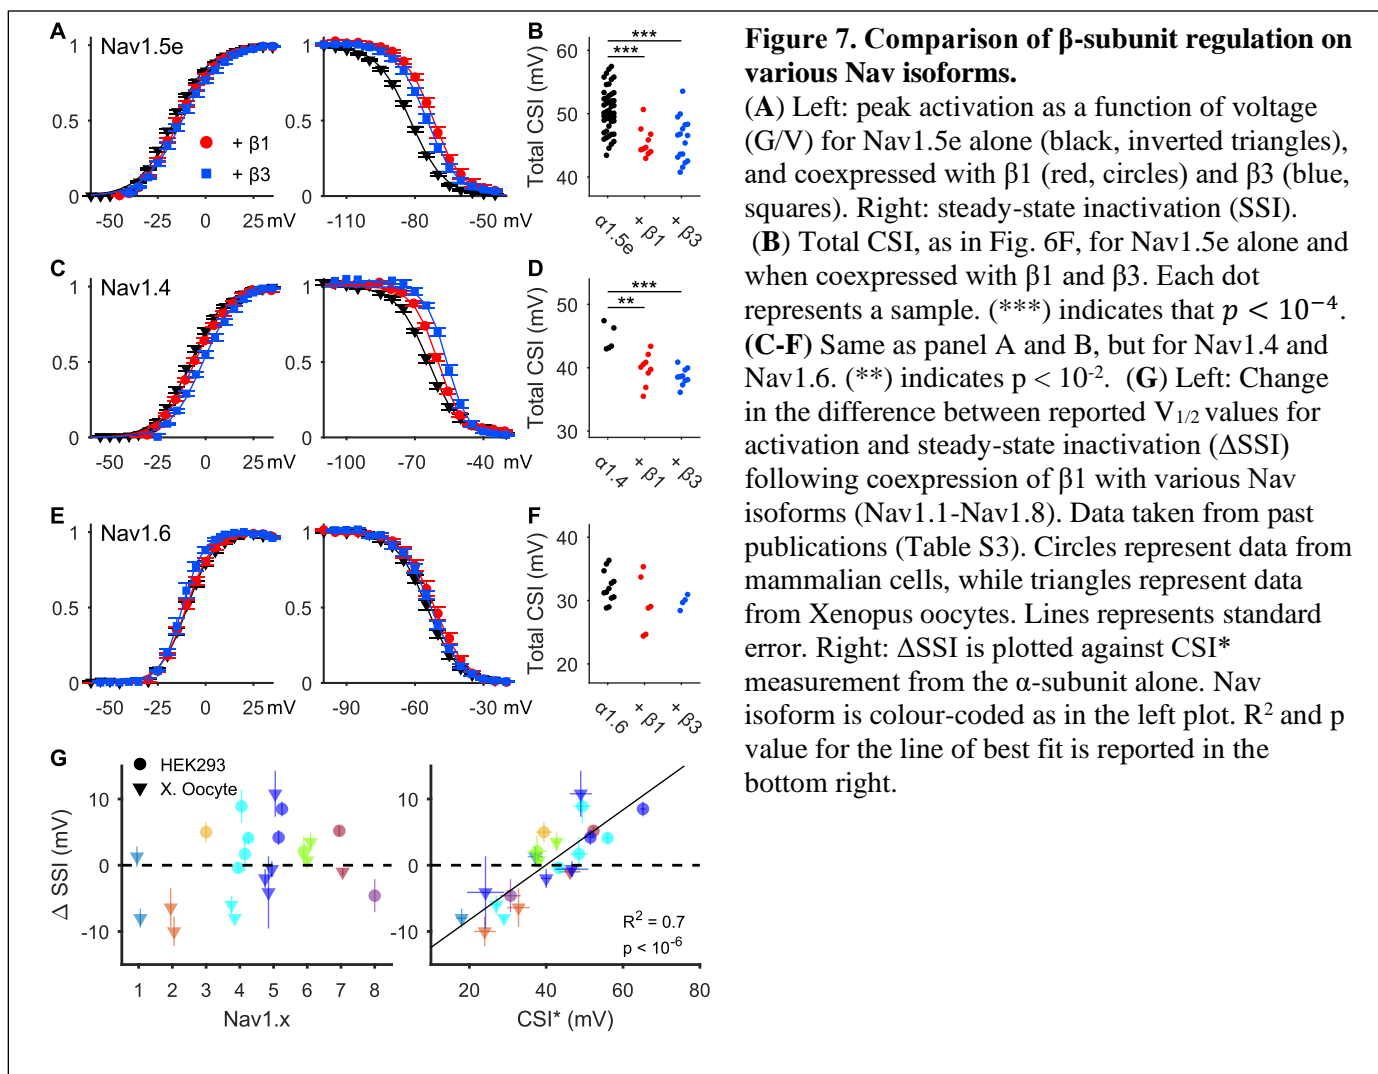

362

363

## Discussion

364

365

366

367

368

369

370

371

372

373

374

375

The present study advances our understanding of voltage-gated sodium (Nav) channels in several important and interrelated ways. First, we show that the functional contributions of the various voltage sensing domains to channel gating depend on the channel's propensity for closed-state inactivation (CSI), a gating property which reflects the movement order of the voltage sensors. Second, this study reveals that Nav channels do not follow a single, prototypical gating sequence. Instead, our experiments demonstrate that the gating of Nav channels is better explained as a continuum of gating behaviours defined by each channel's propensity for CSI. Third and finally, we show that CSI is selectively targeted by  $\beta 1$  and  $\beta 3$  auxiliary subunits to exert their allosteric effect on skeletal muscle, cardiac, and neuronal Nav channels. In fact, we provide strong evidence that this mechanism extends to every Nav channel isoform, suggesting a novel form of channel regulation. In sum, we propose that the weak to strong modulation of all Nav channel isoforms by  $\beta 1$  and  $\beta 3$  is not a direct result of



376 structural differences, per se, but is rather a natural consequence of variability in the  
377 intrinsic dynamics of channel gating.

### 378 **Differing contributions of voltage sensing domains to Nav channel activation and** 379 **inactivation** 380

381 Previous charge neutralization experiments have reported disparate changes to the voltage-  
382 dependence of activation when comparing skeletal muscle (Capes et al., 2013; Chahine et  
383 al., 1994), neuronal (Kontis and Goldin, 1997), and cardiac (Chen et al., 1996) Nav  
384 channels. Here, we show that changes to the voltage-dependence of activation is an  
385 unreliable marker for a domain's role in activation, whereas the latency to peak current is  
386 more informative (Fig. 2). Using this measure, we found that in the neonatal sodium  
387 channel, Nav1.5e, DI movement is likely rate limiting for pore opening and DII movement  
388 contributes significantly, but to a lesser degree. Although DIII movement is thought to be  
389 necessary for channel activation in Nav1.4 skeletal muscle channels (Chanda and Bezanilla,  
390 2002), neutralizing DIII in Nav1.5 did not alter channel activation (Figs. 1 & 2). This is  
391 likely because DIII is already in its activated position in wildtype Nav1.5 channels at the  
392 voltage range used in our protocols (Fig. 4) (Hsu et al., 2017; Zhu et al., 2017).  
393 Consequently, neutralizing the domain's voltage sensor would not be expected to  
394 significantly alter the overall activation process. Finally, although DIV-CN Nav1.5 mutants  
395 exhibit an altered voltage-dependence of activation, the observed effects are more consistent  
396 with an increased inactivation rate (Fig. 2F & Fig. S4). Considering this, we did not find  
397 evidence that DIV movement is necessary for activation, consistent with previous  
398 experiments on Nav1.4 channels that were mutated to prevent inactivation (Goldschen-Ohm  
399 et al., 2013). In summary, our results suggest that DI and DII movements determine the rate  
400 of activation, whereas DIII, at least in Nav1.5, likely plays little role in activation at  
401 physiological membrane potentials.

402 Charge-neutralization experiments on Nav1.4 have suggested that DIV is uniquely  
403 sufficient for inactivation (Capes et al., 2013), whereas recent VCF experiments on Nav1.5  
404 have strongly implicated both DIII and DIV in inactivation (Hsu et al., 2017). Here, we  
405 found that neutralizing either DIII or DIV led to a similar hyperpolarizing shift and  
406 flattening of the SSI curve. Furthermore, we observed that SSI in DIV-CN Nav1.5 mutants  
407 is strongly correlated with DIII movement (Fig. 4E). Together, this suggests that the Nav1.5  
408 inactivation is intrinsically coupled to DIII movement. Notably, DIV-CN Nav1.4 mutants  
409 inactivate at voltages too hyperpolarized to be caused by the movement of DIII (Capes et  
410 al., 2013; Chanda and Bezanilla, 2002), and DIII-CN Nav1.4 mutants did not display  
411 significantly altered SSI (Capes et al., 2013). Accordingly, we conclude that DIII is coupled  
412 to inactivation differently in Nav1.4 and Nav1.5 channels, which could explain the  
413 divergent views surrounding the role of DIII in inactivation (Ahern et al., 2016; Armstrong  
414 and Hollingworth, 2018). Finally, although we found that in Nav1.5 neutralizing DI and DII  
415 significantly affected inactivation, these observations could be explained by interdomain  
416 coupling with DIV. Nevertheless, our observations suggest that DI and DII movements can  
417 functionally contribute to channel inactivation, even if they are not necessary for  
418 inactivation, per se. Overall, our results highlight unappreciated variability in the molecular  
419 basis of channel gating across Nav channel isoforms.

## 421 **Closed-state inactivation modulates the contributions of voltage sensing domains**

422 It is well established that Nav channels can inactivate from closed states (Aldrich et al.,  
423 1983; Armstrong, 2006; Bean, 1981; Lawrence et al., 1991; Vandenberg and Horn, 1984),  
424 which is thought to occur when DIII and DIV (possibly just DIV in Nav1.4) move prior to  
425 channel activation (Armstrong, 2006). Nevertheless, the prevailing idea is that DIV  
426 movement is substantially slower than the other domains across all voltages (Armstrong,  
427 2006; Bosmans et al., 2008; Capes et al., 2013; Chanda and Bezanilla, 2002), implying that  
428 inactivation occurs predominantly from the open state. Interestingly, almost all evidence for  
429 this delayed DIV movement is from Nav1.4 channels (Capes et al., 2013; Chanda and  
430 Bezanilla, 2002; Goldschen-Ohm et al., 2013). In contrast to Nav1.4, however, we observed  
431 a high propensity for CSI in wildtype Nav1.5 channels (Fig. 6D), indicating a gating  
432 sequence that is preferential to early DIV movement. We showed that such a difference in  
433 gating sequence is sufficient to explain the contrasting outcomes of voltage sensor  
434 neutralization between Nav1.4 and Nav1.5 channels. Furthermore, we found that this  
435 apparent dichotomy of low and high CSI gating in fact defines a *continuum* of gating  
436 behaviours along which all Nav channel isoforms lie (Fig. 7 & 8). This study thus suggests  
437 that the gating sequence is a variable parameter which modulates the contributions of each  
438 voltage sensor to activation and inactivation across Nav channels. More generally, our  
439 modelling predicts that CSI should modulate the effects of any gating modifiers which  
440 target the movements of these voltage sensing domains. Indeed, this mechanism succeeded  
441 in predicting the effects of auxiliary  $\beta$  subunits (discussed below), highlighting the  
442 unappreciated importance of CSI in the biological functionality of all Nav channels.  
443

## 444 **Intrinsic gating properties of Nav channels dictate auxiliary subunit regulation**

445 The auxiliary subunits,  $\beta 1$  and  $\beta 3$ , have surprisingly varied effects on Nav channel gating,  
446 even within a single isoform (Fig. 7G, Table S3). Consequently, this variability is likely not  
447 due to differences in channel structure (Jiang et al., 2020; Shen et al., 2019). Rather, the  
448 observations made here motivate an alternative explanation:  $\beta 1$  and  $\beta 3$  specifically target  
449 CSI such that their effects on channel gating are determined by the variable dynamics of the  
450 pore-forming subunit. Theoretically, we found that if  $\beta 1$  and  $\beta 3$  stabilize the resting state of  
451 DIV, as demonstrated in Nav1.5 using VCF (Zhu et al., 2017), then their effects should  
452 depend on the channel's propensity for CSI (Fig. S4). This prediction was confirmed by our  
453 experiments comparing Nav1.4, Nav1.5, and Nav1.6 channels (Fig. 7).

454 Intriguingly, the idea that the intrinsic gating properties of a channel predetermine the  
455 effects of allosteric modifiers has also recently been suggested for AMPA receptors (Dawe  
456 et al., 2019). Depending on the channel splice variant (flip or flop), gating modifiers, such  
457 as anions and auxiliary subunits, either exert an effect (flip) or no effect (flop), similar to  
458 what we observe for high and low CSI Nav channels. This switching in regulation was  
459 shown to be due to the mobility of the apo or resting state of the receptor (Dawe et al.,  
460 2019), suggesting a critical role for the intrinsic dynamics of the pore-forming subunits.  
461 These observations point to an over-arching principle of ion channel regulation which could  
462 be tested by exploring the potential role of the intrinsic gating to other ion channel families.

463 Notably, our predictions concerning the influence of CSI on Nav channel regulation  
464 extend to any gating modifiers which target the movements of specific voltage sensing  
465 domains. Interestingly, several studies on toxins that target voltage sensors – which include

466 certain scorpion, sea anemone, and cone snail toxins (Ahern et al., 2016) – have described  
467 varied effects across Nav channel isoforms (Alami et al., 2003; Leipold et al., 2006;  
468 Oliveira et al., 2004). Although many of these observations have been ascribed to structural  
469 variation between the channels, it would be informative to assess the extent to which  
470 differences in CSI may also contribute. Since any compounds which target voltage sensor  
471 movements in Nav channels have potential as novel drugs for chronic pain, epilepsy, and  
472 heart disorders (Bosmans and Swartz, 2010; Cardoso and Lewis, 2019), identifying sources  
473 of CSI variability *in vivo* and understanding why CSI is so poorly controlled for *in vitro*  
474 (Fig. 7G) may have particular importance for novel drug design. Finally, it has been  
475 suggested that insights into channelopathies may be realized through the analysis of  
476 “homologous” mutations across Nav channels (Loussouarn et al., 2016). Whether CSI alters  
477 the consequences of other mutations as profoundly as the voltage sensor neutralizing  
478 mutations performed here is clearly of interest for future study.

## 479 480 **Methods**

### 481 **Molecular biology**

482 The mouse mH1 pcDNA3.1(+)-plasmid was obtained from Dr. T. Zimmer (Camacho et al.,  
483 2006). Exon 6a cDNA was amplified out of mouse brain homogenates, using the Access  
484 RT-PCR System (Promega), and then exchanged with exon 6b in mH1 using the  
485 Quikchange method of site-directed mutagenesis (SDM) (Braman et al., 1996), to generate  
486 the Nav1.5e plasmid. A similar RT-PCR approach was also used to clone out the mouse  $\beta$ 1  
487 and  $\beta$ 3 cDNA and insert it into a pcDNA3.1(+) vector.

488 Charge-neutralizing mutations of Nav1.5e were engineered using single-primer  
489 reaction in parallel (SPRINP) SDM (Edelheit et al., 2009). Primers (Integrated DNA  
490 Technologies) were designed containing both the amino acid exchanges of interest and a  
491 silent restriction site. Following the PCR reaction, unmutated templates were digested using  
492 0.4-0.8 U/ $\mu$ L of DpnI (New England Biolabs). The resulting PCR mixture was transformed  
493 into house-grown competent DH5 $\alpha$ . Colonies were grown overnight on agar plates and  
494 picked for liquid culturing in 25 g/L Lysogeny Broth (Fisher Bioreagents). Plasmids were  
495 harvested using QIAprep Spin Miniprep Kits (Qiagen). Mutations were screened via  
496 restriction digest and gel electrophoresis, using the silent restriction sites initially designed  
497 into the SDM primers. Plasmid sequences were verified with Sanger sequencing done by  
498 the Innovation Centre of McGill University and Genome Quebec, using Sequencher 4.8 and  
499 CLC Sequence Viewer 8.0.

500 Nav1.5e DIV-CN constructs were modified further by conjugating the Nav sequence  
501 to an engineered GFP fluorophore called Mystik (Mys) via a P2A linker. The P2A allowed  
502 for the stoichiometric 1:1 translation of the Mystik and Nav genes, so that cells showcasing  
503 the strongest fluorescence were the most likely to express the Nav channel in higher  
504 abundance (Ahier and Jarriault, 2014). The allowed us to overcome the poor expression of  
505 Nav1.4 alone. Primers (Integrated DNA Technologies) with overhangs containing  
506 fragments of the Nav plasmid’s 5’ untranslated region or part of the P2A-Nav sequence  
507 were used to PCR amplify a double-stranded “megaprimer” containing (from 5’ to 3’): the  
508 5’ UTR upstream of the Nav channel, the entire Mys gene, the P2A sequence, and the 5’  
509 end of the Nav channel cDNA. This megaprimer was then isolated via gel electrophoresis,

510 extracted into solution using MinElute Gel Extraction Kits (Qiagen), and inserted into the  
511 Nav channel plasmid by means of the Quikchange method of PCR discussed previously.

## 512 513 **Cell culture**

514 Human embryonic kidney cells mutated to over-express the SV40 large T-antigen (HEK-  
515 293T cells) were used as the expression system for electrophysiological recordings. HEK-  
516 293T cultures were maintained in minimal essential media containing Glutamax (MEM-  
517 glutamax; Gibco), supplemented with 10% fetal bovine serum (FBS; Gibco), and kept at  
518 conditions of 37°C, 100% humidity, and 5% CO<sub>2</sub> in a ThermoForma Series II Water-  
519 Jacketed CO<sub>2</sub> Incubator (ThermoFisher). Main HEK-293T stocks were grown in T-25  
520 Flasks (Corning) and twice a week passaged using Trypsin-EDTA solution (Gibco) into 35-  
521 mm Tissue-Culture Treated Culture Dishes (Corning) for transfection purposes. The  
522 calcium phosphate transfection protocol (Jordan et al., 1996) was used to transiently  
523 transfect HEK-293T cells at least 24 hours before recordings. Each 35-mm culture dish was  
524 loaded with 0.5 µg of the Nav channel plasmid, 0.2 µg of the transfection reporter Mys  
525 (unless already present, as in the Mys-P2A-Nav constructs), and, if present, 1.5 µg of β1 or  
526 β3. The cDNA mixture was dissolved in 560 mM of CaCl<sub>2</sub> (unless otherwise indicated, all  
527 chemical reagents are from Sigma-Aldrich), and an equal volume of 2XBES solution (in  
528 mM: 50 BES, 280 NaCl, and 1.5 Na<sub>2</sub>HPO<sub>4</sub>) was added to induce precipitate formation.  
529 After roughly one minute, the DNA-calcium phosphate precipitates were added to a single  
530 culture dish. The dish was then returned to the incubator where cells had time to be  
531 transfected, typically over 6 to 9 hours. The reaction was quenched 6 to 9 hours later by  
532 rinsing with phosphate-buffered saline (PBS, in mM: 137 NaCl, 2.7 KCl, 10.1 Na<sub>2</sub>HPO<sub>4</sub>,  
533 and 2 NaH<sub>2</sub>PO<sub>4</sub>) containing 1 mM EDTA and rinsed with PBS containing 1 mM MgCl<sub>2</sub> and  
534 1 mM CaCl<sub>2</sub>. Transfected HEK-293T cells were left to recover overnight.

## 535 536 **Electrophysiology**

537 At least two hours before the start of recordings, transfected cells were dissociated from  
538 their cultures using Accutase and then re-plated at a lower density. This step increased the  
539 yield of isolated cells, minimizing gap junctions that form between adjacent HEK-293T  
540 cells and optimizing the quality of the voltage-clamp conditions. Culture media was  
541 replaced with external solution containing (in mM): 155 NaCl, 4 KCl, 5 HEPES, 1 MgCl<sub>2</sub>,  
542 and 1.8 CaCl<sub>2</sub>, with pH adjusted to 7.3-7.4 using NaOH. Cells were patched with  
543 microelectrodes containing an internal solution that was optimized for voltage-clamp  
544 conditions, made up of (in mM): 115 CsCl, 5 HEPES, 5 Cs<sub>4</sub>-BAPTA, 1 MgCl<sub>2</sub>, 0.5 CaCl<sub>2</sub>,  
545 10 Na<sub>2</sub>ATP, with pH adjusted to 7.3-7.4 using CsOH and sucrose added to keep the  
546 osmolality matching that of the external solution, between 295-300 mOsm. Borosilicate  
547 glass capillaries – with an inner diameter of 1.15 mm, an outer diameter of 1.65 mm, a  
548 length of 100 mm, and a 0.1 mm filament (King Precision Glass, Inc) – were pulled using a  
549 PP-830 vertical puller (Narishige), yielding microelectrodes with a pipette resistance of 1 to  
550 5 MΩ. Microelectrode tips were then dipped into Bees-Wax Pure Natural (Integra Miltext)  
551 and subsequently fire-polished with an MF-900 Micro Forge (Narishige), to reduce noise  
552 and improve membrane seals. Dissociated cells were viewed using an Eclipse Ti-U Inverted  
553 Microscope (Nikon). Transfected cells were identified by their green fluorescence, excited



554 by a DC4104 4-Channel LED Driver (Thorlabs). Positive pressure was applied orally to  
555 electrodes before being lowered to the bottom of the recording chamber using an MP-285  
556 micromanipulator (Sutter Instrument). Once the electrode tip was positioned just above the  
557 surface of the cell, the release of the positive pressure was sufficient to form a glass-  
558 membrane seal of at least 1 G $\Omega$ . Pulses of negative pressure were then delivered to improve  
559 the strength of the seal and eventually break through, giving access to the whole-cell patch-  
560 clamp configuration. All recordings were done at room temperature.

561 Voltage commands were delivered through an AxoPatch 200B Amplifier (Axon  
562 Instruments). Capacitive transients from the pipette and from the cell were cancelled, cell  
563 capacitance and series resistance were monitored to avoid changes exceeding 30% over the  
564 course of the recording, and series resistance was compensated to the amplifier's maximum  
565 (98% on the machine, but in practice probably closer to 80%). Currents were acquired at  
566 100 kHz, low-pass Bessel filtered at 5 kHz using a Model 900 Tunable Active Filter  
567 (Frequency Devices), and telegraphed via an Axon Digidata 1550 (Molecular Devices). All  
568 data was collected and saved digitally using pClamp 10.7 software (Axon Instruments).

### 570 **Voltage-clamp protocols**

571 When cells were not being recorded, either between protocols or between sweeps within a  
572 protocol, they were clamped at a holding potential of -60 mV. To assess channel activation,  
573 cells were stepped down to the baseline potential for 300 ms, depolarized to a series of  
574 potentials between -110 and +70 mV in increments of 5 mV for 100 ms, then returned to the  
575 baseline potential for another 300 ms. This baseline potential was either -100 mV for  
576 Nav1.5e, or -130 mV in the case of the charge-neutralized mutants, to counter the latter's  
577 increased propensity for channel inactivation. To assess steady-state inactivation, cells were  
578 stepped down to the baseline potential for 300 ms, given a pre-pulse that varied between -  
579 160 mV and -5 mV in increments of 5 mV for 100 ms, pulsed directly to the test pulse  
580 potential of -10 mV for 50 ms, then returned to -100 mV for an additional 300 ms. Leak  
581 subtraction was performed on the raw data in a custom Igor Pro (Wavemetrics) program  
582 post-hoc.

### 584 **Voltage-clamp fluorometry**

585 All experiments conducted on *Xenopus laevis* were done with the approval of and according  
586 to the guidelines established by the Animal Care Committee of the National Institutes of  
587 Natural Sciences, an umbrella institution of the National Institute for Physiological  
588 Sciences. We obtained the Nav1.5 VCF constructs used by Varga et al. (Varga et al., 2015)  
589 from Dr. Johnathon R. Silva and used site-directed mutagenesis, as described previously, to  
590 convert them to their respective Nav1.5e variants (with the exception of position 215, which  
591 was not mutated to leucine because it was used as a labelling cysteine). The four Nav genes,  
592 inserted on pMax vectors, could be linearized using PacI (TOYOBO) and used as a template  
593 to generate cRNA using the mMMESSAGE T7 RNA transcription kit (Thermo Fisher  
594 Scientific).

595 The oocytes of *Xenopus laevis* were surgically harvested from anaesthetized animals  
596 as described previously (Kume et al., 2018). Oocytes were separated and defolliculated using



597 2 mg/ml collagenase treatment for 6.5 hours. Then oocytes were incubated overnight at  
598 17°C in Ringer's solution containing (in mM): 88 NaCl, 1 KCl, 2.4 NaHCO<sub>3</sub>, 0.3 Ca(NO<sub>3</sub>)<sub>2</sub>,  
599 0.41 CaCl<sub>2</sub>, 0.82 MgSO<sub>4</sub>, and 15 HEPES, with pH adjusted to 7.4 with NaOH and use of  
600 0.1% penicillin-streptomycin. The remaining follicular layers were manually peeled. 25 ng  
601 of Nav channel cRNA was injected into the vegetal pole of oocytes using Nanoject II  
602 (Drummond). Treated oocytes were then returned to their 17°C incubator and left for 1 to 3  
603 days to express protein.

604 Oocytes were labelled for 20 minutes using 10 µM of methanethiosulfonate-  
605 carboxytetramethylrhodamine (MTS-TAMRA) dye on ice. Dye conjugation was done in  
606 depolarizing solution (containing, in mM, 110 KCl, 1.5 MgCl<sub>2</sub>, 0.8 CaCl<sub>2</sub>, 0.2 EDTA and  
607 10 HEPES, pH adjusted to 7.1 with KOH) in an effort to expose and label S4 helices.  
608 Excess dye was removed by rinsing five times with fresh ND-96 solution (96 mM NaCl, 2  
609 mM KCl, 1.8 mM CaCl<sub>2</sub>, 1 mM MgCl<sub>2</sub>, 5 mM HEPES, with pH adjusted to 7.4 with  
610 NaOH). Oocytes in solution were kept on ice until use. Eventually, oocytes were transferred  
611 to the recording chamber filled with ND-96 solution, at room temperature, oriented in such  
612 a way that fluorescent recordings were done on the animal pole. Voltage clamp for  
613 macroscopic current recording was performed by using an amplifier (OC-725C, Warner  
614 Instruments). Borosilicate glass capillaries (World Precision Instruments) were used with a  
615 resistance of 0.1–0.3 MΩ when filled with 3 M KOAc and 10 mM KCl. The fluorescent  
616 recordings were performed with the fluorescence microscope (Olympus BX51WI) equipped  
617 with a water immersion objective lens (Olympus XLUMPLAN FL 20x/1.00). The light  
618 source was emitted by a xenon arc lamp (L2194-01, Hamamatsu Photonics) and passed  
619 through a band-pass excitation filter (520-550 nm). The intensity of the excitation light was  
620 decreased to prevent the fluorophore from bleaching by ND filters (Olympus U-25ND6 and  
621 U-25ND25). Emitted light was passed through a band-pass emission filter (580IF). The  
622 emission signals were detected by a photomultiplier (Hamamatsu Photonics H10722-110).  
623 The baseline signal was adjusted to 2 V. The detected current and fluorescent signal were  
624 acquired by a Digidata 1332 (Axon Instruments) and Clampex 10.3 software (Molecular  
625 Devices) at 100 kHz.

626 Oocytes were held at a baseline of -60 mV between sweeps and protocols. Once we  
627 could detect a visible change in fluorescence upon depolarization of the oocyte from -120  
628 mV to +60 mV, we could run the following activation protocol. The oocyte was stepped  
629 down to -120 mV for about 300 ms, then hyperpolarized/depolarized to a series of  
630 potentials between -180 mV and +60 mV in increments of 10 mV for 100 ms, then stepped  
631 back to -120 mV for about 300 ms before returning to baseline. The protocol was run and  
632 averaged 10 times to improve the signal-to-noise ratio in the fluorescent output. Voltage-  
633 clamp fluorometry data was analyzed automatically using custom-made Igor Pro scripts.

## 634 **Literature search**

636 Values for the effect of β1 coexpression on Nav gating were gathered from published  
637 studies found through searching keywords on Google Scholar and from papers cited in these  
638 studies. The search was restricted to data collected in either HEK293 cells or Xenopus  
639 oocytes. Following least-squares regression of ΔSSI against CSI\*, one outlier was identified

640 using Cook's distance and subsequently excluded from the analysis (Nav1.8; *Xenopus*  
641 oocytes; (Vijayaragavan et al., 2001)). All numerical values are reported in Table S3.

## 642 643 **Data analysis and statistics**

644 For activation,  $E_{Na}$  was determined by fitting the linear part of the current-voltage curve to a  
645 line and extrapolating its x-intercept. Conductance was calculated as  $I/(V-E_{Na})$ , then fit with  
646 a Boltzmann function

$$647 \quad G(V) = \frac{G_{max}}{1 + e^{-\frac{V-V_{1/2}}{k}}}$$

648 where  $G_{max}$  is the maximum conductance,  $V_{1/2}$  is the half-activation potential, and  $k$  is the  
649 slope factor of voltage sensitivity. For steady-state inactivation, peak currents following the  
650 test pulse were plotted against the corresponding pre-pulse potential; a Boltzmann function  
651 was then fit to this I-V curve. To calculate time to peak, the maximum current occurring at  
652 least 0.5 ms following the voltage step was identified (to avoid identifying capacitive  
653 transients at low voltages). The latency from the moment of voltage step to this peak was  
654 calculated.

655 To experimentally quantify the fraction of inactivation occurring from closed states  
656 (i.e. closed-state inactivation), we adapted the method proposed by Armstrong (Armstrong,  
657 2006). Briefly, open-state inactivation was estimated during a conditioning voltage step (-  
658 100 ms long, ranging from -120 to -5 mV), and then compared to the fraction of available  
659 channels during a subsequent test pulse (-10 mV), thereby estimating the fraction of steady-  
660 state inactivation occurring through open states (Fig. 6C). Closed-state inactivation was  
661 then defined as the complementary fraction. Specifically, open-state inactivation (OSI) was  
662 estimated by the equation

$$663 \quad OSI(V) \propto \sum_{t=0}^{\tau} g(t; V) \Delta t,$$

664 where  $g(t; V)$  is the experimentally observed channel conductance at time  $t$  for voltage step  
665  $V$ . In the original method (Armstrong, 2006), OSI was scaled by assuming 100% of steady-  
666 state inactivation occurs from open states at 0 mV. However, our data displayed  
667 significantly more closed-state inactivation than was observed by Armstrong (Armstrong,  
668 2006) and consequently OSI did not necessarily attain a maximum within the tested voltage  
669 range. We therefore modified this method by fitting a Boltzmann function,  $f(V) =$   
670  $\alpha(1 + e^{-(V-V_{1/2})/k})^{-1}$ , to the unscaled OSI versus voltage curve to obtain a scaling factor,  
671 i.e.  $\alpha$ . This allowed open-state inactivation to attain its maximum outside of the observed  
672 voltage range.

673 For statistical analysis, Tukey's method was used following a one-way ANOVA, with  
674 a significance level of  $p < 0.01$ . All data was reported as mean  $\pm$  SE. CSI\* was calculated  
675 as the difference between group means; the standard error estimate of CSI\* (for plotting  
676 purposes, see Fig. 7G) was thus defined in the sense of Welch's t-test, i.e.  $SE =$   
677  $\sqrt{s_1^2/N_1 + s_2^2/N_2}$ .

678

679

## Computational modelling

680

681

682

683

684

685

686

687

688

689

690

691

692

693

694

695

696

For simulations of Nav gating, the kinetic model of Nav1.4 developed by Capes et al. (Capes et al., 2013) was reparametrized with a custom-made evolutionary fitting algorithm programed in MATLAB 2017b (The MathWorks, Inc.). The first generation of models were initialized with parameters drawn from a multivariate Gaussian centered at the Nav1.4 parameters with zero covariance and a coefficient of variation of 1. Each individual was assessed on z-scores calculated with respect to our experimental observations of the integral, peak amplitude, and time to peak of the activation and inactivation currents, as well as the recovery from inactivation, steady-state inactivation, and IV curves (Fig. S2). We ran the algorithm until the maximum fitness did not improve by at least 10% over 40 generations. When reparametrizing the model, we relaxed several assumptions made by the original authors. Specifically, we removed the constraint that the voltage-dependent charge of transitions reflecting movement of the same domain be the same and did not define any parameters with respect to others, no longer forcing microscopic reversibility. Nonetheless, the modelled conductances were well behaved during all simulations and our sensitivity analyses demonstrated a smoothness of model output with respect to local perturbations (Fig. S2E, F), suggesting that we did not overfit the model. The resulting parameter values are reported in Table S2.

697

698

699

700

701

To produce the low CSI gating model (Fig. 5 & Fig. S4), the parameters were adjusted to bias DIV to move following pore opening. This was done by decreasing the forward rate of DIV movement while the channel was closed ( $\alpha_4$  was decreased 100 fold) and increasing the forward rate following pore opening ( $\alpha_{4O}$  was increased 100 fold). Consequently, the probability of CSI was reduced.

702

703

704

705

706

All simulated protocols were identical to those applied experimentally. The modelled current was calculated as  $I_{mem} = (O + O_4)(V - E_{rev})$ , where  $E_{rev}$  is the average reversal potential calculated experimentally, O and  $O_4$  are the open states of the channel, and V is voltage. As for all protocols with applied step voltages, solutions to the model were computed using the exponential of the transition matrix.

707

708

## Data and materials availability

709

710

711

712

713

Summary data and all the code used in the generation of figures is publicly available at <https://github.com/niklasbrake/Nav2020>. Raw data is available upon request from the authors.

714

715

716

717

718

719

We thank Dr. Mark Aurousseau who cloned Nav1.5e from brain extracts and Dr. Jonathan R. Silva for the gift of Nav1.5 voltage-clamp fluorometry cDNA constructs. We also thank members of the Bowie laboratory, for discussions and comments on the manuscript.

720

721

**Funding:** This work was supported by Canadian Institutes of Health Research Operating Grants CIHR MOP-342247 to D.B, by the Natural Sciences and Engineering Council of

722 Canada Discovery Grant to A.K., and by JSPS KAKENHI grants 17H04021 and  
723 20H03424 to Y.K. N.B. was supported by the NSERC-CREATE in Complex Dynamics  
724 Graduate Scholarship. A.S.M. was supported by the NSERC CGS-Master's Scholarship.  
725

726 **Author contributions:**

727 Conceptualization: NB, ASM, and DB

728 Methodology: NB, TS, and YK

729 Software: NB

730 Validation: HS

731 Formal Analysis: NB, ASM, YY, HS, and TS

732 Investigation: NB, ASM, YY, and HS

733 Writing – Original Draft: NB and DB

734 Writing – Review & Editing: all authors

735 Visualization: NB

736 Supervision: AK and DB; Project Administration, DB

737 Funding Acquisition: YK, AK, and DB  
738

739 **Competing interests:** Authors declare that they have no competing interests.  
740  
741  
742

743 **References**

- 744  
745 Ahern CA, Payandeh J, Bosmans F, Chanda B. 2016. The hitchhiker's guide to the voltage-  
746 gated sodium channel galaxy. *J Gen Physiol* **147**:1–24. doi:10.1085/jgp.201511492  
747  
748 Ahier A, Jarriault S. 2014. Simultaneous Expression of Multiple Proteins Under a Single  
749 Promoter in *Caenorhabditis elegans* via a Versatile 2A-Based Toolkit. *Genetics*  
**196**:605–613. doi:10.1534/genetics.113.160846  
750  
751 Alami M, Vacher H, Bosmans F, Devaux C, Rosso JP, Bougis PE, Tytgat J, Darbon H,  
752 Martin-Eauclaire MF. 2003. Characterization of Amm VIII from *Androctonus*  
753 *mauretanicus mauretanicus*: A new scorpion toxin that discriminates between neuronal  
and skeletal sodium channels. *Biochem J* **375**:551–560. doi:10.1042/BJ20030688  
754  
755 Aldrich RW, Corey DP, Stevens CF. 1983. A reinterpretation of mammalian sodium channel  
gating based on single channel recording. *Nature* **306**:436–41. doi:10.1038/306436a0  
756  
757 Armstrong CM. 2006. Na channel inactivation from open and closed states. *Proc Natl Acad*  
*Sci* **103**:17991–17996. doi:10.1073/pnas.0607603103  
758  
759 Armstrong CM, Hollingworth S. 2018. A perspective on Na and K channel inactivation. *J*  
*Gen Physiol* **150**:7–18. doi:10.1085/jgp.201711835  
760  
761 Bao H, Hakeem A, Henteleff M, Starkus JG, Rayner MD. 1999. Voltage-insensitive Gating  
762 after Charge-neutralizing Mutations in the S4 Segment of Shaker Channels. *J Gen*  
*Physiol* **113**:139–151. doi:10.1085/jgp.113.1.139  
763  
764 Bean BP. 1981. Sodium channel inactivation in the crayfish giant axon. Must channels open  
before inactivating? *Biophys J* **35**:595–614. doi:10.1016/S0006-3495(81)84815-1

- 765 Bendahhou S, Cummins TR, Potts JF, Tong J, Agnew WS. 1995. Serine-1321-independent  
766 regulation of the  $\mu 1$  adult skeletal muscle  $\text{Na}^+$  channel by protein kinase C. *Proc Natl*  
767 *Acad Sci U S A* **92**:12003–12007. doi:10.1073/pnas.92.26.12003
- 768 Bosmans F, Martin-Eauclaire M-F, Swartz KJ. 2008. Deconstructing voltage sensor function  
769 and pharmacology in sodium channels. *Nature* **456**:202–208. doi:10.1038/nature07473
- 770 Bosmans F, Swartz KJ. 2010. Targeting voltage sensors in sodium channels with spider  
771 toxins. *Trends Pharmacol Sci* **31**:175–182. doi:10.1016/j.tips.2009.12.007
- 772 Braman J, Papworth C, Greener A. 1996. Site-directed mutagenesis using double-stranded  
773 plasmid DNA templates. *Methods in Molecular Biology (Clifton, N.J.)*. doi:10.1385/1-  
774 59259-038-1:835
- 775 Camacho JA, Hensellek S, Rougier J-S, Blechschmidt S, Abriel H, Benndorf K, Zimmer T.  
776 2006. Modulation of  $\text{Na}^+$  v 1.5 Channel Function by an Alternatively Spliced Sequence  
777 in the DII/DIII Linker Region. *J Biol Chem* **281**:9498–9506.  
778 doi:10.1074/jbc.M509716200
- 779 Campos F V., Chanda B, Beirão PSL, Bezanilla F. 2007.  $\beta$ -Scorpion toxin modifies gating  
780 transitions in all four voltage sensors of the sodium channel. *J Gen Physiol* **130**:257–  
781 268. doi:10.1085/jgp.200609719
- 782 Capes DL, Arcisio-Miranda M, Jarecki BW, French RJ, Chanda B. 2012. Gating transitions  
783 in the selectivity filter region of a sodium channel are coupled to the domain IV voltage  
784 sensor. *Proc Natl Acad Sci U S A* **109**:2648–2653.
- 785 Capes DL, Goldschen-Ohm MP, Arcisio-Miranda M, Bezanilla F, Chanda B. 2013. Domain  
786 IV voltage-sensor movement is both sufficient and rate limiting for fast inactivation in  
787 sodium channels. *J Gen Physiol* **142**:101–112. doi:10.1085/jgp.201310998
- 788 Cardoso FC, Lewis RJ. 2019. Structure–Function and Therapeutic Potential of Spider  
789 Venom-Derived Cysteine Knot Peptides Targeting Sodium Channels. *Front Pharmacol*  
790 **10**:366. doi:10.3389/fphar.2019.00366
- 791 Catterall WA, Goldin AL, Waxman SG. 2005. International Union of Pharmacology. XLVII.  
792 Nomenclature and Structure-Function Relationships of Voltage-Gated Sodium  
793 Channels. *Pharmacol Rev* **57**:397–409. doi:10.1124/pr.57.4.4
- 794 Cha A, Bezanilla F. 1997. Characterizing Voltage-Dependent Conformational Changes in  
795 the ShakerK<sup>+</sup> Channel with Fluorescence. *Neuron* **19**:1127–1140. doi:10.1016/S0896-  
796 6273(00)80403-1
- 797 Cha A, Ruben PC, George AL, Fujimoto E, Bezanilla F. 1999. Voltage sensors in domains  
798 III and IV, but not I and II, are immobilized by  $\text{Na}^+$  channel fast inactivation. *Neuron*  
799 **22**:73–87. doi:10.1016/S0896-6273(00)80680-7
- 800 Chahine M, George AL, Zhou M, Ji S, Sun W, Barchi RL, Horn R. 1994. Sodium channel  
801 mutations in paramyotonia congenita uncouple inactivation from activation. *Neuron*  
802 **12**:281–294. doi:10.1016/0896-6273(94)90271-2
- 803 Chanda B, Asamoah OK, Bezanilla F. 2004. Coupling Interactions between Voltage Sensors  
804 of the Sodium Channel as Revealed by Site-specific Measurements. *J Gen Physiol*  
805 **123**:217–230. doi:10.1085/jgp.200308971



- 806 Chanda B, Bezanilla F. 2002. Tracking voltage-dependent conformational changes in  
807 skeletal muscle sodium channel during activation. *J Gen Physiol* **120**:629–645.  
808 doi:10.1085/jgp.20028679
- 809 Chen LQ, Santarelli V, Horn R, Kallen RG. 1996. A unique role for the S4 segment of  
810 domain 4 in the inactivation of sodium channels. *J Gen Physiol* **108**:549–556.  
811 doi:10.1085/jgp.108.6.549
- 812 Cummins TR, Aglietto F, Renganathan M, Herzog RI, Dib-Hajj SD, Waxman SG. 2001.  
813 Nav1.3 sodium channels: Rapid repriming and slow closed-state inactivation display  
814 quantitative differences after expression in a mammalian cell line and in spinal sensory  
815 neurons. *J Neurosci* **21**:5952–5961. doi:10.1523/jneurosci.21-16-05952.2001
- 816 Das S, Gilchrist J, Bosmans F, Van Petegem F. 2016. Binary architecture of the Nav 1.2- $\beta$ 2  
817 signaling complex. *Elife* **5**:e10960. doi:10.7554/eLife.10960
- 818 Dawe GB, Kadir MF, Venskutonyte R, Perozzo AM, Yan Y, Alexander RPD, Navarrete C,  
819 Santander EA, Arsenault M, Fuentes C, Arousseau MRP, Frydenvang K, Barrera NP,  
820 Kastrop JS, Edwardson JM, Bowie D. 2019. Nanoscale Mobility of the Apo State and  
821 TARP Stoichiometry Dictate the Gating Behavior of Alternatively Spliced AMPA  
822 Receptors. *Neuron* **102**:976-992.e5. doi:10.1016/j.neuron.2019.03.046
- 823 Dolphin AC. 2018. Voltage-gated calcium channels: Their discovery, function and  
824 importance as drug targets. *Brain Neurosci Adv* **2**:1–8. doi:10.1177/2398212818794805
- 825 Edelheit O, Hanukoglu A, Hanukoglu I. 2009. Simple and efficient site-directed mutagenesis  
826 using two single-primer reactions in parallel to generate mutants for protein structure-  
827 function studies. *BMC Biotechnol* **9**:61. doi:10.1186/1472-6750-9-61
- 828 Fahmi AI, Patel M, Stevens EB, Fowden AL, John JE, Lee K, Pinnock R, Morgan K,  
829 Jackson AP, Vandenberg JI. 2001. The sodium channel beta-subunit SCN3b modulates  
830 the kinetics of SCN5a and is expressed heterogeneously in sheep heart. *J Physiol*  
831 **537**:693–700. doi:10.1111/j.1469-7793.2001.00693.x
- 832 Ferrera L, Moran O. 2006.  $\beta$ 1-subunit modulates the Nav1.4 sodium channel by changing the  
833 surface charge. *Exp Brain Res* **172**:139–150. doi:10.1007/s00221-005-0323-4
- 834 Gagnon DG, Bezanilla F. 2009. A single charged voltage sensor is capable of gating the  
835 Shaker K<sup>+</sup> channel. *J Gen Physiol* **133**:467–483. doi:10.1085/jgp.200810082
- 836 Goldschen-Ohm MP, Capes DL, Oelstrom KM, Chanda B. 2013. Multiple pore  
837 conformations driven by asynchronous movements of voltage sensors in a eukaryotic  
838 sodium channel. *Nat Commun* **4**:1310–1350. doi:10.1038/ncomms2356
- 839 Gonzalez-Perez V, Lingle CJ. 2019. Regulation of BK Channels by Beta and Gamma  
840 Subunits. *Annu Rev Physiol* **81**:113–137. doi:10.1146/annurev-physiol-022516-034038
- 841 Hayward LJ, Brown RH, Cannon SC. 1996. Inactivation defects caused by myotonia-  
842 associated mutations in the sodium channel III-IV linker. *J Gen Physiol* **107**:559–576.  
843 doi:10.1085/jgp.107.5.559
- 844 Hsu EJ, Zhu W, Schubert AR, Voelker T, Varga Z, Silva JR. 2017. Regulation of Na<sup>+</sup>  
845 channel inactivation by the DIII and DIV voltage-sensing domains. *J Gen Physiol*  
846 **149**:389–403. doi:10.1085/jgp.201611678

- 847 Hull JM, Isom LL. 2018. Voltage-gated sodium channel  $\beta$  subunits: The power outside the  
848 pore in brain development and disease. *Neuropharmacology* **132**:43–57.  
849 doi:10.1016/j.neuropharm.2017.09.018
- 850 Isom LL, De Jongh KS, Patton DE, Reber BF, Offord J, Charbonneau H, Walsh K, Goldin  
851 AL, Catterall WA. 1992. Primary structure and functional expression of the beta 1  
852 subunit of the rat brain sodium channel. *Science* **256**:839–842.  
853 doi:10.1126/science.256.5058.839
- 854 Isom LL, Ragsdale DS, De Jongh KS, Westenbroek RE, Reber BFX, Scheuer T, Catterall  
855 WA. 1995. Structure and function of the  $\beta$ 2 subunit of brain sodium channels, a  
856 transmembrane glycoprotein with a CAM motif. *Cell* **83**:433–442. doi:10.1016/0092-  
857 8674(95)90121-3
- 858 Jiang D, Shi H, Tonggu L, Gamal El-Din TM, Lenaeus MJ, Zhao Y, Yoshioka C, Zheng N,  
859 Catterall WA. 2020. Structure of the Cardiac Sodium Channel. *Cell* **180**:122–134.e10.  
860 doi:10.1016/j.cell.2019.11.041
- 861 Jordan M, Schallhorn A, Wurm FM. 1996. Transfecting Mammalian Cells: Optimization of  
862 Critical Parameters Affecting Calcium-Phosphate Precipitate Formation. *Nucleic Acids*  
863 *Res* **24**:596–601. doi:10.1093/nar/24.4.596
- 864 Kontis KJ, Goldin AL. 1997. Sodium channel inactivation is altered by substitution of  
865 voltage sensor positive charges. *J Gen Physiol* **110**:403–413. doi:10.1085/jgp.110.4.403
- 866 Kume S, Shimomura T, Tateyama M, Kubo Y. 2018. Two mutations at different positions in  
867 the CNBH domain of the hERG channel accelerate deactivation and impair the  
868 interaction with the EAG domain. *J Physiol* **596**:4629–4650. doi:10.1113/JP276208
- 869 Laedermann CJ, Syam N, Pertin M, Decosterd I, Abriel H. 2013.  $\beta$ 1- and  $\beta$ 3- voltage-gated  
870 sodium channel subunits modulate cell surface expression and glycosylation of Nav1.7  
871 in HEK293 cells. *Front Cell Neurosci*. doi:10.3389/fncel.2013.00137
- 872 Lawrence JH, Yue DT, Rose WC, Marban E. 1991. Sodium channel inactivation from  
873 resting states in guinea-pig ventricular myocytes. *J Physiol* **443**:629–650.  
874 doi:10.1113/jphysiol.1991.sp018855
- 875 Leipold E, Hansel A, Borges A, Heinemann SH. 2006. Subtype specificity of scorpion  $\beta$ -  
876 toxin Tz1 interaction with voltage-gated sodium channels is determined by the pore  
877 loop of domain 3. *Mol Pharmacol* **70**:340–347. doi:10.1124/mol.106.024034
- 878 Loussouarn G, Sternberg D, Nicole S, Marionneau C, Le Bouffant F, Toumaniantz G, Barc  
879 J, Malak OA, Fressart V, Péréon Y, Baró I, Charpentier F. 2016. Physiological and  
880 Pathophysiological Insights of Nav1.4 and Nav1.5 Comparison. *Front Pharmacol* **6**.  
881 doi:10.3389/fphar.2015.00314
- 882 Malhotra JD, Chen C, Rivolta I, Abriel H, Malhotra R, Mattei LN, Brosius FC, Kass RS,  
883 Isom LL. 2001. Characterization of sodium channel  $\alpha$ - and  $\beta$ -subunits in rat and mouse  
884 cardiac myocytes. *Circulation* **103**:1303–1310. doi:10.1161/01.CIR.103.9.1303
- 885 Nuss HB, Chiamvimonvat N, Pérez-García MT, Tomaselli GF, Marbán E. 1995. Functional  
886 association of the  $\beta$ 1 subunit with human cardiac (hH1) and rat skeletal muscle ( $\mu$ 1)  
887 sodium channel  $\alpha$  subunits expressed in *Xenopus* oocytes. *J Gen Physiol* **106**:1171–

- 888 1191. doi:10.1085/jgp.106.6.1171
- 889 Oliveira JS, Redaelli E, Zaharenko AJ, Cassulini RR, Konno K, Pimenta DC, Freitas JC,  
890 Clare JJ, Wanke E. 2004. Binding specificity of sea anemone toxins to Nav 1.1-1.6  
891 sodium channels. Unexpected contributions from differences in the IV/S3-S4 outer  
892 loop. *J Biol Chem* **279**:33323–33335. doi:10.1074/jbc.M404344200
- 893 Onkal R, Mattis JH, Fraser SP, Diss JKJ, Shao D, Okuse K, Djamgoz MBA. 2008.  
894 Alternative splicing of Nav1.5: An electrophysiological comparison of “neonatal” and  
895 “adult” isoforms and critical involvement of a lysine residue. *J Cell Physiol* **216**:716–  
896 726. doi:10.1002/jcp.21451
- 897 Pan X, Li Z, Zhou Q, Shen H, Wu K, Huang X, Chen J, Zhang J, Zhu X, Lei J, Xiong W,  
898 Gong H, Xiao B, Yan N. 2018. Structure of the human voltage-gated sodium channel  
899 Na v 1.4 in complex with  $\beta$ 1. *Science* **362**:eaau2486. doi:10.1126/science.aau2486
- 900 Patino GA, Claes LRF, Lopez-Santiago LF, Slat EA, Dondeti RSR, Chen C, O’Malley HA,  
901 Gray CBB, Miyazaki H, Nukina N, Oyama F, De Jonghe P, Isom LL. 2009. A  
902 functional null mutation of SCN1B in a patient with Dravet syndrome. *J Neurosci*  
903 **29**:10764–10778. doi:10.1523/JNEUROSCI.2475-09.2009
- 904 Qu Y, Isom LL, Westenbroek RE, Rogers JC, Tanada TN, McCormick KA, Scheuer T,  
905 Catterall WA. 1995. Modulation of Cardiac Na<sup>+</sup> Channel Expression in *Xenopus*  
906 Oocytes by  $\beta$ 1 Subunits. *J Biol Chem* **270**:25696–25701. doi:10.1074/jbc.270.43.25696
- 907 Sánchez-Solano A, Islas AA, Scior T, Paiz-Candia B, Millan-PerezPeña L, Salinas-Stefanon  
908 EM. 2017. Characterization of specific allosteric effects of the Na<sup>+</sup> channel  $\beta$ 1 subunit  
909 on the Nav1.4 isoform. *Eur Biophys J* **46**:485–494. doi:10.1007/s00249-016-1193-3
- 910 Sheets MF, Kyle JW, Kallen RG, Hanck DA. 1999. The Na Channel Voltage Sensor  
911 Associated with Inactivation Is Localized to the External Charged Residues of Domain  
912 IV, S4. *Biophys J* **77**:747–757. doi:https://doi.org/10.1016/S0006-3495(99)76929-8
- 913 Shen H, Liu D, Wu K, Lei J, Yan N. 2019. Structures of human Na v 1.7 channel in complex  
914 with auxiliary subunits and animal toxins. *Science* **363**:1303–1308.  
915 doi:10.1126/science.aaw2493
- 916 Smith RD, Goldin AL. 1998. Functional analysis of the rat I sodium channel in *Xenopus*  
917 oocytes. *J Neurosci* **18**:811–820. doi:10.1523/jneurosci.18-03-00811.1998
- 918 Tan J, Soderlund DM. 2011. Independent and joint modulation of rat Nav1.6 voltage-gated  
919 sodium channels by coexpression with the auxiliary  $\beta$ 1 and  $\beta$ 2 subunits. *Biochem*  
920 *Biophys Res Commun* **407**:788–792. doi:10.1016/j.bbrc.2011.03.101
- 921 Twomey EC, Yelshanskaya M V., Sobolevsky AI. 2019. Structural and functional insights  
922 into transmembrane AMPA receptor regulatory protein complexes. *J Gen Physiol*  
923 **151**:1347–1356. doi:10.1085/jgp.201812264
- 924 Vandenberg CA, Horn R. 1984. Inactivation viewed through single sodium channels. *J Gen*  
925 *Physiol* **84**:535–64. doi:10.1085/jgp.84.4.535
- 926 Varga Z, Zhu W, Schubert AR, Pardieck JL, Krumholz A, Hsu EJ, Zaydman MA, Cui J,  
927 Silva JR. 2015. Direct Measurement of Cardiac Na<sup>+</sup> Channel Conformations Reveals  
928 Molecular Pathologies of Inherited Mutations. *Circ Arrhythmia Electrophysiol* **8**:1228–

- 929 1239. doi:10.1161/CIRCEP.115.003155
- 930 Vijayaragavan K, O’Leary ME, Chahine M. 2001. Gating Properties of Na v 1.7 and Na v  
931 1.8 Peripheral Nerve Sodium Channels. *J Neurosci* **21**:7909–7918.  
932 doi:10.1523/JNEUROSCI.21-20-07909.2001
- 933 Wang J, Ou SW, Bai YF, Wang YJ, Xu ZQD, Luan GM. 2017. Multiple Nav1.5 isoforms  
934 are functionally expressed in the brain and present distinct expression patterns  
935 compared with cardiac Nav1.5. *Mol Med Rep* **16**:719–729. doi:10.3892/mmr.2017.6654
- 936 Yan Z, Zhou Q, Wang L, Wu J, Zhao Y, Huang G, Peng W, Shen H, Lei J, Yan N. 2017.  
937 Structure of the Na v 1.4- $\beta$ 1 Complex from Electric Eel. *Cell* **170**:470-482.e11.  
938 doi:10.1016/j.cell.2017.06.039
- 939 Zhao J, O’Leary ME, Chahine M. 2011. Regulation of Nav1.6 and Nav1.8 peripheral nerve  
940 Na<sup>+</sup> channels by auxiliary  $\beta$ -subunits. *J Neurophysiol* **106**:608–619.  
941 doi:10.1152/jn.00107.2011
- 942 Zhu W, Voelker TL, Varga Z, Schubert AR, Nerbonne JM, Silva JR. 2017. Mechanisms of  
943 noncovalent  $\beta$  subunit regulation of NaV channel gating. *J Gen Physiol* **149**:813–831.  
944 doi:10.1085/jgp.201711802
- 945
- 946

947 **Supplementary Figures & Tables**

948

949

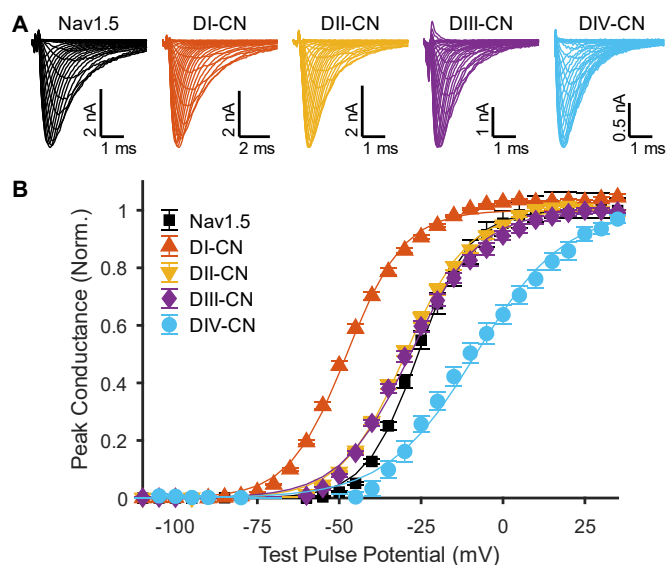

950

951

952

953

954

955

956

957

958

**Fig. S1. Changes in peak GV following domain neutralization in adult form of Nav1.5, mH1.**

(A) Representative traces of ionic currents corresponding to wild-type (WT) Nav1.5 (cell 20170311c3) and mutant channels (DI-CN, cell 20180301c6; DII-CN, cell 20180711c3; DIII-CN, cell 20180309c12; DIV-CN, cell 20181022c7) in response to depolarizing voltage steps ranging from -110 to 35 mV, following a holding potential of -130 mV (-100 mV for WT), recorded in HEK-293T cells. (B) Summary data corresponding to panel A, showing normalized peak current following the test pulse, as a function of the test pulse voltage.



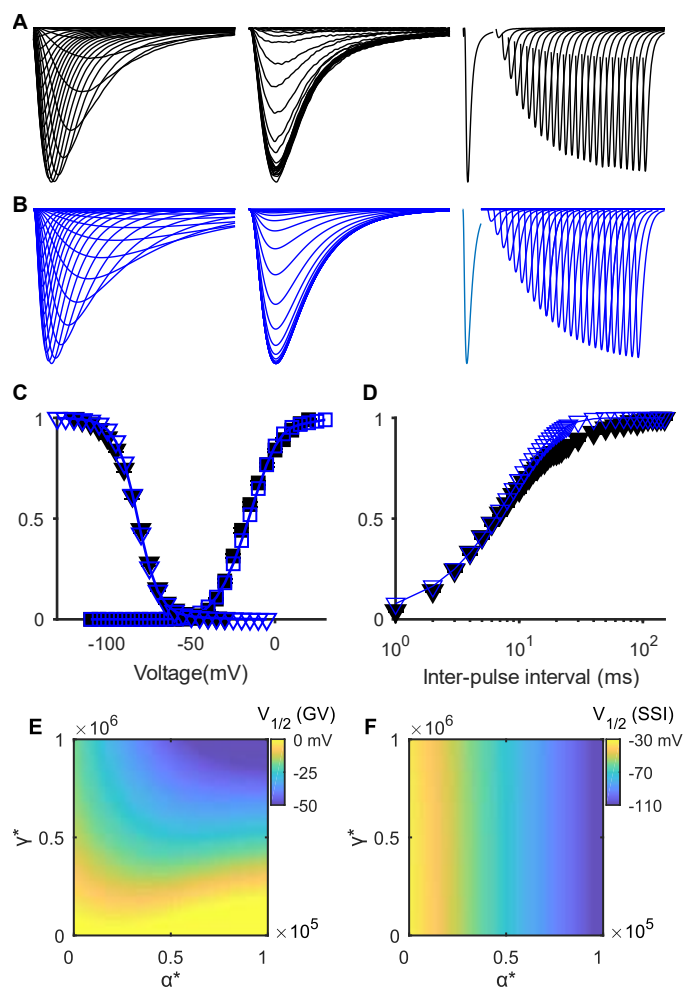

**Fig. S2. Comparison of reparametrized Nav1.5e model to data.**

(A) From left to right, averaged currents recorded from WT Nav1.5e channels during the activation protocol (as in Fig. 1), inactivation protocol (as in Fig. 3) and recovery from inactivation protocol (currents elicited by a test pulse of -10 mV, following a holding potential of -10 mV and a hyperpolarizing inter-pulse of -120 mV which lasted between 1-150 ms). (B) Modelled currents with the gating model in Fig. 2A and parameters from Supplementary Table S2. (C) Steady-state inactivation (inverted triangles) and GV (square) curves of WT Nav1.5e channel (black) and model (blue). (D) Fraction of recovered current as a function of inter-pulse interval for the WT channel (black) and model (blue). (E) Heat-map showing the sensitivity of the  $V_{1/2}$  of GV. At low values of  $\alpha^*$ , changes in  $\gamma^*$  have little effect on the  $V_{1/2}$  of GV, and vice versa. However, as both are increased, the  $V_{1/2}$  of GV becomes more hyperpolarized. (F) Heat-map showing the sensitivity of the  $V_{1/2}$  of SSI to changes in  $\alpha^*$  and  $\gamma^*$ . As  $\alpha^*$  increases, a hyperpolarizing shift in the  $V_{1/2}$  of SSI is observed, whereas changes in  $\gamma^*$  produce almost no effects on SSI. Both heat-maps are color-coded based on the color-bars to the right of each panel.

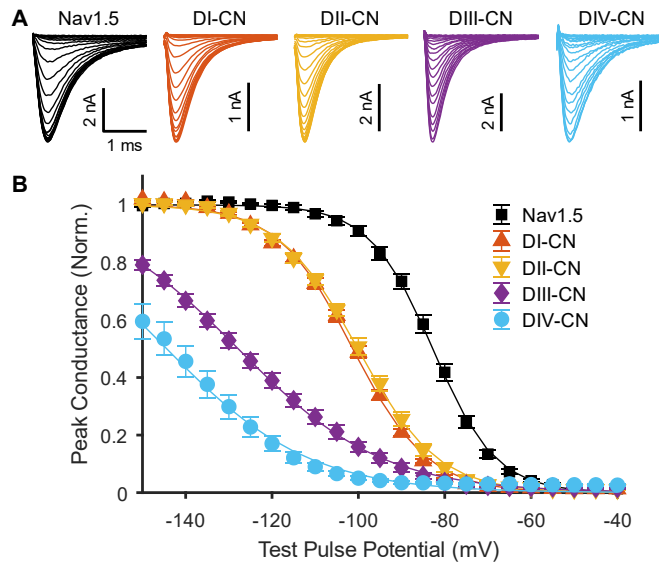

975  
976 **Fig. S3. Changes in steady-state inactivation following domain neutralization in adult**  
977 **form of Nav1.5, mH1.**

978 (A) Representative traces of ionic currents corresponding to wild-type (WT) Nav1.5 (cell  
979 20170311c3) and mutant channels (DI-CN, cell 20180301c6; DII-CN, cell 20180711c3;  
980 DIII-CN, cell 20180309c12; DIV-CN, cell 20190305c4) in response to a test pulse to -10  
981 mV following conditioning pulses ranging from -160 to -30 mV. (B) Summary data  
982 corresponding to panel A, showing normalized peak current following the test pulse, as a  
983 function of the conditioning pulse voltage.

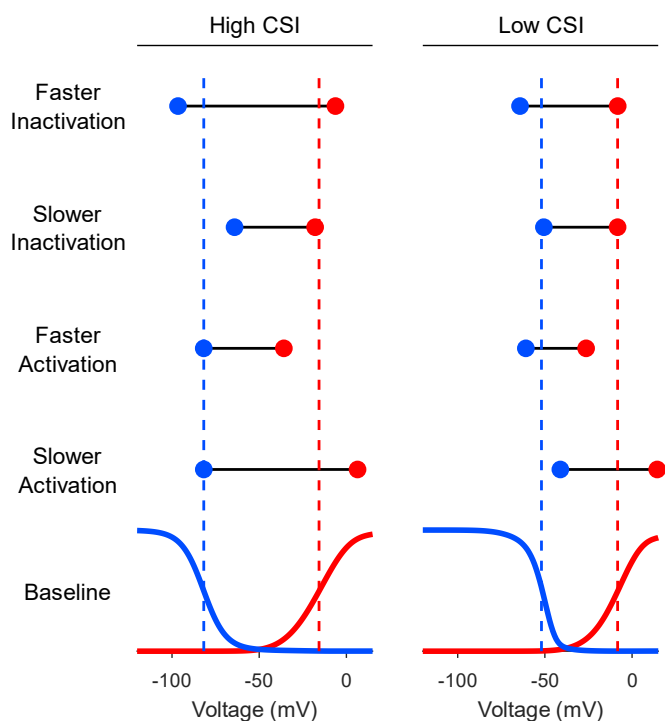

984  
985 **Fig. S4. Comparison of models with high and low propensities for closed-state**  
986 **inactivation (CSI).**

987 High CSI refers to the reparametrized Nav1.5e model (Fig. 2A and Table S2). Low CSI  
988 refers to the same model, where inactivation has been biased towards open-state  
989 inactivation (see Methods). The GV (red) and SSI (blue) curves of these two models  
990 are depicted at the bottom (baseline). Above these curves are depicted the changes in the  $V_{1/2}$  of  
991 GV (red circle) and SSI (blue circle) following four different parameter modifications, with  
992 the dashed lines providing a reference to the baseline values: faster inactivation,  $\alpha_4$   
993 increased 10-fold; slower inactivation,  $\alpha_4$  decreased 10-fold; faster activation,  $\gamma$  increased  
994 10-fold; slower activation,  $\gamma$  decreased 10-fold.  
995

996 **Table S1. Boltzmann parameters for Nav1.5e.**

| Nav1.5e              | $V_{1/2}$        | k               | n  |
|----------------------|------------------|-----------------|----|
| WT <sup>†</sup>      | $-16.8 \pm 0.5$  | $9.0 \pm 0.1$   | 51 |
|                      | $-82.0 \pm 0.5$  | $-7.2 \pm 0.1$  | 49 |
| DI-CN                | $-48.1 \pm 0.6$  | $9.9 \pm 0.1$   | 24 |
|                      | $-100.9 \pm 0.5$ | $-8.7 \pm 0.1$  | 23 |
| DII-CN               | $-22.6 \pm 0.5$  | $9.6 \pm 0.2$   | 26 |
|                      | $-96.5 \pm 0.8$  | $-9.2 \pm 0.2$  | 25 |
| DIII-CN              | $-19.0 \pm 0.6$  | $10.3 \pm 0.2$  | 23 |
|                      | $-120.0 \pm 1.1$ | $-14.4 \pm 0.2$ | 23 |
| DIV-CN               | $-7.4 \pm 1.3$   | $10.7 \pm 0.3$  | 14 |
|                      | $-131.1 \pm 2.6$ | $-13.7 \pm 1.5$ | 13 |
| + $\beta_1$          | $-14.8 \pm 0.7$  | $8.6 \pm 0.1$   | 14 |
|                      | $-73.5 \pm 1.0$  | $-6.1 \pm 0.3$  | 11 |
| + $\beta_3$          | $-13.8 \pm 0.8$  | $8.9 \pm 0.2$   | 18 |
|                      | $-74.5 \pm 0.6$  | $-6.2 \pm 0.2$  | 17 |
| DI*-VCF <sup>‡</sup> | $-65.4 \pm 2.3$  | $12.3 \pm 1.2$  | 13 |
| DII*-VCF             | $-44.1 \pm 0.7$  | $22.2 \pm 0.6$  | 17 |
| DIII*-VCF            | $-137.4 \pm 1.1$ | $15.9 \pm 0.6$  | 27 |
| DIV*-VCF             | $-69.5 \pm 1.3$  | $13.2 \pm 0.5$  | 15 |

997 <sup>†</sup>Top row for each channel contains estimated Boltzmann parameters for peak activation (G/V)  
 998 and bottom row contains parameters for steady-state inactivation (SSI). <sup>‡</sup>Parameters for VCF  
 999 constructs are fits to the fluorescence-voltage (F-V) curve. Data report mean  $\pm$  S.E.  
 1000

1001 **Table S2. Parameters for Nav1.5e gating model.**

| Rate constant | $k^*$             | $q$    | Cooperativity factor |       |
|---------------|-------------------|--------|----------------------|-------|
| $\alpha$      | 17,000            | -0.23  | $x_\alpha$           | 0.73  |
| $\beta$       | 830               | 1.4    | $x_\beta$            | 0.092 |
| $\alpha_4$    | 1,000             | -0.22  | $y_\alpha$           | 4.1   |
| $\beta_4$     | $3.0 \times 10^6$ | -0.43  | $y_\beta$            | 0.65  |
| $\alpha_{4o}$ | 1,800             | -0.7   |                      |       |
| $\beta_{4o}$  | 74                | 1.7    |                      |       |
| $\gamma$      | 10,000            | -3.0   |                      |       |
| $\gamma_i$    | 51,000            | -5.2   |                      |       |
| $\gamma_4$    | 17,000            | -6.2   |                      |       |
| $\delta$      | 910               | -1.9   |                      |       |
| $\delta_4$    | 690               | -2.2   |                      |       |
| $\delta_i$    | 3,000             | -0.81  |                      |       |
| $i$           | 25,000            | -0.013 |                      |       |
| $r$           | 5,200             | 0.054  |                      |       |
| $i_o$         | 11,000            | 0.11   |                      |       |
| $r_o$         | 0.001             | 0      |                      |       |

1002 Parameter values for the fit shown in Fig. S2. The rate,  $k$ , of each transition is computed as  $k = k^*$   
 1003  $\exp(-qV/KT)$ , where  $V$  is the membrane voltage,  $K$  is Boltzmann's constant,  $T$  is the temperature,  
 1004 and  $k^*$  and  $q$  are fitted parameters. The cooperativity factors  $x$  and  $y$  reflect the degree of coupling  
 1005 between the activation of DI–III and DIV activation or channel inactivation, respectively.  
 1006  
 1007



**Table S3. Summary for  $\beta 1$  effects on activation and inactivation.**

| Isoform | Inactivation |             | Activation  |             | Cell   | Ref.                         |
|---------|--------------|-------------|-------------|-------------|--------|------------------------------|
|         | $\alpha$     | + $\beta 1$ | $\alpha$    | + $\beta 1$ |        |                              |
| Nav1.1  | -55.5 ± 1.3  | -54.2 ± 0.8 | -18.3 ± 1.5 | -19.0 ± 1.8 | HEK    | Patino et al. (2009)         |
|         | -35.0 ± 1.0  | -43.0 ± 1.0 | -17.0 ± 1.0 | -18.0 ± 1.0 | Oocyte | Smith and Goldin (1998)      |
| Nav1.2  | -51.7 ± 2.6  | -58.1 ± 1.3 | -18.9 ± 1.4 | -20.1 ± 3.1 | Oocyte | Patino et al. (2009)         |
|         | -42.0 ± 2.0  | -52.0 ± 1.0 | -18.0 ± 2.0 | -21.0 ± 2.0 | Oocyte | Smith and Goldin (1998)      |
| Nav1.3  | -64.9 ± 1.5  | -59.9 ± ??  | -25.5 ± 1.6 | -25.5 ± ??  | HEK    | Cummins et al. (2001)        |
| Nav1.4  | -54.0 ± 1.0  | -60.0 ± 1.0 | -27.0 ± 1.0 | -26.0 ± 1.0 | Oocyte | Nuss et al. (1995)           |
|         | -54.0 ± 0.4  | -62.0 ± 0.1 | -25.0 ± 0.5 | -33.0 ± 0.3 | Oocyte | Sánchez-Solano et al. (2017) |
|         | -66.1 ± 0.6  | -66.5 ± 0.5 | -22.8 ± 0.9 | -23.9 ± 1.2 | HEK    | Ferrera and Moran (2006)     |
|         | -74.2 ± 1.9  | -65.3 ± 1.6 | -24.8 ± 1.2 | -24.7 ± 2.3 | HEK    | Bendahhou et al. (1995)      |
|         | -67.7 ± 1.3  | -66.0 ± 2.2 | -19.2 ± 2.0 | -19.1 ± 4.7 | HEK    | Hayward et al. (1996)        |
|         | -64.0 ± 0.7  | -59.9 ± 0.5 | -8.0 ± 0.7  | -6.1 ± 0.6  | HEK    | This study                   |
|         | -76.0 ± 1.0  | -78.0 ± 1.0 | -36.0 ± 1.0 | -37.0 ± 1.0 | Oocyte | Nuss et al. (1995)           |
| Nav1.5  | -52.0 ± 4.2  | -56.1 ± 3.5 | -27.8 ± 2.3 | -28.7 ± 1.6 | Oocyte | Qu et al. (1995)             |
|         | -65.3 ± 0.9  | -65.9 ± 0.8 | -18.6 ± 4.2 | -23.3 ± 2.0 | Oocyte | Fahmi et al. (2001)          |
|         | -84.8 ± 2.5  | -74.0 ± 2.4 | -35.8 ± 1.4 | -34.6 ± 1.9 | Oocyte | Zhu et al. (2017)            |
|         | -77.1 ± 0.5  | -72.9 ± 1.0 | -25.6 ± 1.0 | -24.9 ± 1.0 | HEK    | Malhotra et al. (2001)       |
|         | -82.0 ± 0.5  | -73.5 ± 1.0 | -16.8 ± 0.5 | -14.8 ± 0.7 | HEK    | This study                   |
| Nav1.6  | -74.3 ± 2.3  | -72.2 ± 0.6 | -36.7 ± 1.1 | -34.8 ± 1.7 | HEK    | Zhao et al. (2011)           |
|         | -51.5 ± 0.4  | -50.8 ± 0.3 | -13.4 ± 0.8 | -14.2 ± 0.3 | Oocyte | Tan and Soderlund (2011)     |
|         | -54.2 ± 0.7  | -50.7 ± 1.3 | -11.5 ± 0.5 | -11.6 ± 0.6 | HEK    | This study                   |
| Nav1.7  | -70.9 ± 0.5  | -65.7 ± 0.5 | -18.6 ± 0.4 | -17.4 ± 1.8 | HEK    | Laedermann et al. (2013)     |
|         | -68.2 ± 0.4  | -69.2 ± 0.4 | -22.0 ± 2.7 | -27.7 ± 1.3 | Oocyte | Vijayaragavan et al. (2001)  |
| Nav1.8  | -43.2 ± 2.0  | -47.8 ± 1.5 | -12.5 ± 1.7 | -16.5 ± 1.4 | HEK    | Bendahhou et al. (1995)      |
|         | -54.8 ± 1.7  | -62.6 ± 2.3 | 4.7 ± 0.7   | -3.3 ± 1.0  | Oocyte | Vijayaragavan et al. (2001)  |
